# Supplementary material
Source: publisher site journal article supplement (https://www.spandidos-publications.com/5538/downloadSupplementary)
Supplement: Supplementary file 1 [file downloadSupplementary]

## Sheet: LPS_vs_control
Table SIV. The target mRNAs of 236 differentially expressed lncRNAs
Query	Query_Gene	Length_Query	Target	Target_Gene	Length_Target	dG	ndG	Start_Position_Query	End_Position_Query	Start_Position_Target	End_Position_Target
NONMMUT036575.2	NONMMUG022514.2	556	NM_030244	Ier5l	1559	-72.86	-0.1375	1	556	252	807
NONMMUT036900.2	NONMMUG022712.2	227	NM_001083126	Lhx6	3292	-44.96	-0.2366	1	227	98	324
NONMMUT043950.2	NONMMUG027118.2	227	NM_001039466	Trim46	2721	-34.2	-0.1621	1	227	1048	1274
NONMMUT046951.2	NONMMUG029023.2	551	NM_023231	Stoml2	1548	-39.26	-0.1407	261	551	1	291
NONMMUT046956.2	NONMMUG029023.2	362	NM_023231	Stoml2	1548	-30.9	-0.1136	78	362	1	285
NONMMUT050617.2	NONMMUG031367.2	537	NM_001159344	Casz1	7966	-53.71	-0.1087	1	537	5181	5717
NONMMUT051494.2	NONMMUG031919.2	345	NM_178403	Pus7	3890	-31.5	-0.1400	55	345	1	291
NONMMUT063765.2	NONMMUG039382.2	281	NM_001040684	Hsd3b7	1771	-35.28	-0.1656	1	248	1524	1771
NONMMUT067031.2	NONMMUG041499.3	666	NM_009229	Sntb2	4473	-91.11	-0.1378	1	666	3777	4442
NONMMUT076272.1	NONMMUG047313.2	273	NM_008567	Mcm6	2966	-26	-0.1275	1	211	2756	2966
NONMMUT085172.1	NONMMUG053054.2	207	NM_001362727	Zfp62	4045	-21.75	-0.1310	1	207	3470	3676
NONMMUT093313.1	NONMMUG013483.2	576	NM_001360046	Serp2	778	-55.04	-0.1033	1	576	38	613
NONMMUT105748.1	NONMMUG021750.2	2432	NM_001164367	Rab11fip2	5363	-43.94	-0.1862	1	244	5120	5363
NONMMUT105807.1	NONMMUG066133.2	239	NM_001347422	Peli3	3957	-28.31	-0.1205	1	239	871	1109
NONMMUT106809.1	NONMMUG022514.2	556	NM_001289709	Sh3glb2	1857	-56.62	-0.1047	1	556	739	1294
NONMMUT107291.1	NONMMUG067081.1	249	NM_001005343	Sp9	2813	-26.99	-0.1273	1	249	1395	1643
NONMMUT114919.1	NONMMUG029164.2	282	NM_001081141	Gabbr2	5578	-28.01	-0.1090	1	282	276	557
NONMMUT124662.1	NONMMUG037091.2	207	NM_027328	Prpf31	3142	-18.55	-0.1008	1	207	608	814
NONMMUT146009.1	NONMMUG091912.1	258	NM_001033447	Gm960	2262	-25.44	-0.1141	1	258	86	343
NONMMUT151929.1	NONMMUG095401.1	300	NM_001252601	Irf7	1763	-30.14	-0.1129	1	300	264	563
NONMMUT152738.1	NONMMUG095800.1	320	NM_001113346	Gatad2a	5062	-49.92	-0.1595	1	320	1	320
NONMMUT154065.1	NONMMUG096395.1	626	NM_001276493	Dag1	5539	-60.38	-0.1005	1	626	1409	2034
NONMMUT028752.2	NONMMUG017779.2	1435	NM_001357782	Gng13	362	-36.64	-0.1021	236	597	1	362
NONMMUT036575.2	NONMMUG022514.2	556	NM_138748	Ptpa	2577	-53.14	-0.1005	1	556	1499	2054
NONMMUT036900.2	NONMMUG022712.2	227	NM_001083127	Lhx6	3188	-44.96	-0.2366	1	227	98	324
NONMMUT043950.2	NONMMUG027118.2	227	NM_001077411	Gba	1973	-21.49	-0.1080	1	227	793	1019
NONMMUT050617.2	NONMMUG031367.2	537	NM_019781	Pex14	1973	-53.93	-0.1021	1	537	1323	1859
NONMMUT050857.2	NONMMUG031526.2	400	NM_177673	Cep104	3277	-36.98	-0.1131	1	400	1975	2374
NONMMUT056816.2	NONMMUG035263.2	446	NM_020589	Zfp467	3619	-59.34	-0.1506	1	446	1416	1861
NONMMUT063765.2	NONMMUG039382.2	281	NM_001081268	Prss53	2531	-34	-0.1478	1	281	1246	1526
NONMMUT068287.2	NONMMUG042239.2	290	NM_001103168	Zglp1	1010	-24.65	-0.1297	62	290	1	229
NONMMUT085172.1	NONMMUG053054.2	207	NM_001362728	Zfp62	4264	-21.75	-0.1310	1	207	3470	3676
NONMMUT102615.1	NONMMUG064169.1	287	NM_001357986	Plekhh2	6879	-25.44	-0.1030	1	287	2825	3111
NONMMUT105060.1	NONMMUG065699.1	663	NM_001177438	Aldh3b2	2161	-78.12	-0.1721	1	482	1680	2161
NONMMUT105807.1	NONMMUG066133.2	239	NM_001362451	Pacs1	4214	-24.87	-0.1535	1	239	138	376
NONMMUT107291.1	NONMMUG067081.1	249	NM_025854	Cir1	1945	-20.61	-0.1234	1	249	492	740
NONMMUT141973.1	NONMMUG089467.1	493	NM_012006	Acot1	1558	-51.89	-0.1177	1	467	1092	1558
NONMMUT149148.1	NONMMUG093797.1	583	NM_001359153	Atxn2	5886	-109.04	-0.2185	1	521	5366	5886
NONMMUT151162.1	NONMMUG094971.1	604	NM_001040085	Sytl2	4731	-54.75	-0.1772	1	355	4377	4731
NONMMUT151929.1	NONMMUG095401.1	300	NM_001282072	Deaf1	2362	-36.27	-0.1468	1	300	44	343
NONMMUT152738.1	NONMMUG095800.1	320	NM_001286450	Gatad2a	5160	-42.57	-0.1468	1	320	7	326
NONMMUT015223.2	NONMMUG009675.2	219	NM_181815	Cep128	4807	-19.4	-0.1026	1	219	650	868
NONMMUT027929.2	NONMMUG017311.2	3194	NM_001362097	B230307C23Rik	1279	-183.39	-0.1457	1882	3160	1	1279
NONMMUT044190.2	NONMMUG027267.3	557	NM_001163641	Setdb1	4660	-50.74	-0.1017	1	557	1537	2093
NONMMUT044248.2	NONMMUG027311.2	388	NM_001025614	Otud7b	8043	-45.65	-0.1244	1	388	22	409
NONMMUT056715.2	NONMMUG035221.2	350	NM_012042	Cul1	3167	-25.1	-0.1328	149	350	1	202
NONMMUT056817.2	NONMMUG035263.2	299	NM_020589	Zfp467	3619	-36.02	-0.1259	1	299	1657	1955
NONMMUT060424.2	NONMMUG037558.2	335	NM_001122603	Fcgbp	7930	-39.23	-0.1381	1	335	1763	2097
NONMMUT060450.2	NONMMUG037574.3	234	NM_001177427	Eid2b	2424	-23.19	-0.1468	1	234	1937	2170
NONMMUT065992.2	NONMMUG040832.2	414	NM_001146153	Homer3	2445	-40.88	-0.1314	1	414	1169	1582
NONMMUT070902.2	NONMMUG043911.2	230	NM_019713	Rassf1	1731	-21.52	-0.1251	1	230	821	1050
NONMMUT078859.1	NONMMUG049065.1	656	NM_178260	Kiss1	496	-48.52	-0.1002	1	496	1	496
NONMMUT085371.1	NONMMUG053167.1	531	NM_001291049	Usp43	4447	-43.68	-0.1060	106	531	1	426
NONMMUT096356.1	NONMMUG015228.2	2525	NM_001162882	Syce3	448	-43.26	-0.1084	32	479	1	448
NONMMUT102657.1	NONMMUG019105.3	227	NM_011104	Prkce	6254	-20.02	-0.1006	1	227	5084	5310
NONMMUT113599.1	NONMMUG071204.1	226	NM_001355211	Zbtb7b	3639	-22.22	-0.1058	1	226	2827	3052
NONMMUT124816.1	NONMMUG078236.1	619	NM_001290497	Tmem91	728	-43.81	-0.1041	119	619	1	501
NONMMUT124905.1	NONMMUG037680.2	528	NM_001043317	Cd22	4097	-69.93	-0.1593	1	528	2655	3182
NONMMUT127727.1	NONMMUG080175.1	648	NM_012016	Ern2	2988	-89.06	-0.1389	1	648	1454	2101
NONMMUT127904.1	NONMMUG039615.2	345	NM_023059	Sigirr	1990	-32.31	-0.1003	1	345	576	920
NONMMUT129217.1	NONMMUG081132.1	231	NM_053200	Ces1d	1966	-20.1	-0.1063	1	231	488	718
NONMMUT132599.1	NONMMUG083482.1	2720	NM_007747	Cox5a	692	-34.6	-0.1231	1	337	356	692
NONMMUT145776.1	NONMMUG091783.1	361	NM_001286608	Banf1	1108	-44.05	-0.1230	1	361	694	1054
NONMMUT149202.1	NONMMUG074954.2	423	NM_010717	Limk1	3323	-46.9	-0.1215	15	423	1	409
NONMMUT010862.2	NONMMUG006854.2	282	NM_001284227	Flot2	2705	-24.84	-0.1150	1	255	2451	2705
NONMMUT031379.2	NONMMUG019271.2	254	NM_001039692	Arhgap12	5032	-20.49	-0.1120	1	205	4828	5032
NONMMUT036575.2	NONMMUG022514.2	556	NM_198304	Nup188	5691	-54.3	-0.1015	1	556	807	1362
NONMMUT041142.2	NONMMUG025497.2	300	NM_001271963	Eya2	2459	-27.59	-0.1049	1	300	2087	2386
NONMMUT043950.2	NONMMUG027118.2	227	NM_001162425	Efna1	1447	-24.57	-0.1164	1	227	466	692
NONMMUT046952.2	NONMMUG029023.2	413	NM_001081413	Unc13b	6405	-43.22	-0.1294	62	413	1	352
NONMMUT049610.2	NONMMUG030721.2	412	NM_001033189	C77080	5187	-36.17	-0.1019	1	412	2346	2757
NONMMUT050858.2	NONMMUG031526.2	578	NM_001126330	Trp73	4756	-70.14	-0.1246	1	578	3972	4549
NONMMUT053799.2	NONMMUG033378.2	347	NM_001301666	Pitpnb	2658	-33.94	-0.1025	1	347	95	441
NONMMUT061197.2	NONMMUG038000.3	374	NM_008654	Ppp1r15a	2333	-36.69	-0.1176	1	374	1858	2231
NONMMUT063765.2	NONMMUG039382.2	281	NM_001362189	Zfp668	7880	-87.24	-0.3196	1	281	4931	5211
NONMMUT064983.2	NONMMUG040136.2	252	NM_001079909	Fgfr1	4758	-26.56	-0.1116	1	252	4400	4651
NONMMUT068287.2	NONMMUG042239.2	290	NM_001110307	Keap1	3151	-40.17	-0.1471	1	290	26	315
NONMMUT085172.1	NONMMUG053054.2	207	NM_001362731	Zfp62	4522	-21.75	-0.1310	1	207	3470	3676
NONMMUT093253.1	NONMMUG058139.1	374	NM_009029	Rb1	4656	-25.27	-0.1270	1	265	4392	4656
NONMMUT094646.1	NONMMUG059088.1	226	NM_009429	Tpt1	894	-20.58	-0.1024	1	226	446	671
NONMMUT105807.1	NONMMUG066133.2	239	NM_001369362	Klc2	2958	-27.58	-0.1204	1	239	2647	2885
NONMMUT106809.1	NONMMUG022514.2	556	NM_001346806	Sh3glb2	1869	-56.62	-0.1047	1	556	751	1306
NONMMUT121644.1	NONMMUG034325.3	326	NM_001243114	Gm3415	2354	-32.38	-0.1035	1	326	1733	2058
NONMMUT124662.1	NONMMUG037091.2	207	NM_175632	Oscar	1845	-24.8	-0.1246	1	207	1364	1570
NONMMUT124895.1	NONMMUG078289.2	689	NM_021397	Zbtb32	1775	-61.81	-0.1015	1	639	1137	1775
NONMMUT141973.1	NONMMUG089467.1	493	NM_134247	Acot4	2325	-52.38	-0.1094	1	493	1359	1851
NONMMUT144127.1	NONMMUG090769.1	1576	NM_009528	Wnt7b	3373	-149.97	-0.1088	187	1576	1	1390
NONMMUT145115.1	NONMMUG091396.1	415	NM_008997	Rab11b	6065	-37.01	-0.1164	1	415	954	1368
NONMMUT147722.1	NONMMUG092928.1	1277	NM_025327	Krtcap2	523	-45.93	-0.1118	1	469	55	523
NONMMUT151162.1	NONMMUG094971.1	604	NM_001252520	Picalm	4178	-60.16	-0.1361	1	489	3690	4178
NONMMUT151929.1	NONMMUG095401.1	300	NM_001287171	Sct	536	-29.17	-0.1126	1	300	200	499
NONMMUT152738.1	NONMMUG095800.1	320	NM_020028	Lpar2	5701	-37.42	-0.1366	1	320	4969	5288
NONMMUT029339.2	NONMMUG018142.2	403	NM_001286573	Ehmt2	3947	-40.82	-0.1052	1	403	3478	3880
NONMMUT031951.2	NONMMUG019647.2	1190	NM_001357470	Paip2	1548	-31.39	-0.2025	1	182	1367	1548
NONMMUT044248.2	NONMMUG027311.2	388	NM_054045	H3c15	1298	-60.93	-0.1629	1	388	382	769
NONMMUT046956.2	NONMMUG029023.2	362	NM_001081413	Unc13b	6405	-32.19	-0.1009	1	362	5803	6164
NONMMUT056817.2	NONMMUG035263.2	299	NM_175099	Repin1	2960	-34.28	-0.1284	1	299	2629	2927
NONMMUT060450.2	NONMMUG037574.3	234	NM_013676	Supt5	3511	-23.07	-0.1068	1	234	2080	2313
NONMMUT067593.2	NONMMUG041876.2	227	NM_001357300	Spata2l	2732	-25.88	-0.1384	1	227	2158	2384
NONMMUT071833.2	NONMMUG044508.2	255	NM_001242953	H2al1h	884	-23.62	-0.1074	1	255	459	713
NONMMUT077602.1	NONMMUG000404.2	295	NM_001126046	Fam178b	2282	-30.31	-0.1110	1	295	1543	1837
NONMMUT100797.1	NONMMUG017693.2	694	NM_001289481	Zscan10	2639	-115.56	-0.1687	1	694	1841	2534
NONMMUT112027.1	NONMMUG070139.2	207	NM_170778	Dpyd	4441	-20.12	-0.1250	1	201	4241	4441
NONMMUT113599.1	NONMMUG071204.1	226	NM_009565	Zbtb7b	3867	-22.22	-0.1058	1	226	3055	3280
NONMMUT113614.1	NONMMUG071215.1	446	NM_011988	Slc27a3	2276	-43.33	-0.1039	1	446	1795	2240
NONMMUT144257.1	NONMMUG090841.1	466	NM_001271603	Socs1	1339	-47.2	-0.1051	3	466	1	464
NONMMUT145776.1	NONMMUG091783.1	361	NM_030109	Sf3b2	3233	-41.25	-0.1179	1	361	538	898
NONMMUT146905.1	NONMMUG024029.3	3190	NM_177253	Cstf3	2637	-36.09	-0.5307	3094	3190	1	97
NONMMUT009927.2	NONMMUG006225.2	479	NM_001040686	Zfp692	1887	-39.26	-0.1145	1	364	1524	1887
NONMMUT029835.2	NONMMUG018436.2	1742	NM_011195	Ptcra	1283	-82.69	-0.1041	846	1742	1	897
NONMMUT044190.2	NONMMUG027267.3	557	NM_018877	Setdb1	4622	-50.74	-0.1017	1	557	1499	2055
NONMMUT044248.2	NONMMUG027311.2	388	NM_026975	Bola1	729	-43.89	-0.1180	11	388	1	378
NONMMUT066775.2	NONMMUG041330.2	521	NM_026274	Rspry1	3849	-43.27	-0.1045	1	434	3416	3849
NONMMUT070902.2	NONMMUG043911.2	230	NM_020263	Cacna2d2	5533	-26.49	-0.1193	1	230	4243	4472
NONMMUT081245.1	NONMMUG050507.1	544	NM_033072	Mbd6	4293	-48.26	-0.1036	1	544	570	1113
NONMMUT087169.1	NONMMUG054300.1	334	NM_027269	Dnaaf2	3390	-30.94	-0.1204	1	334	272	605
NONMMUT091578.1	NONMMUG011201.2	833	NM_178875	Zfp935	2472	-83.9	-0.1065	1	833	1481	2313
NONMMUT100797.1	NONMMUG017693.2	694	NM_001033496	Zfp213	2674	-68.39	-0.1027	1	694	140	833
NONMMUT102761.1	NONMMUG064241.1	304	NM_028658	Ppp1r21	3135	-28.97	-0.1016	1	304	2743	3046
NONMMUT108055.1	NONMMUG067561.1	1327	NM_001164813	Pet117	322	-23.4	-0.1238	1	232	91	322
NONMMUT113599.1	NONMMUG071204.1	226	NM_001370853	Dcst2	2378	-22.16	-0.1045	1	226	2091	2316
NONMMUT113614.1	NONMMUG071215.1	446	NM_001316688	Slc27a3	2298	-43.33	-0.1039	1	446	1817	2262
NONMMUT127904.1	NONMMUG039615.2	345	NM_177897	B4galnt4	3682	-38.49	-0.1184	1	345	861	1205
NONMMUT145776.1	NONMMUG091783.1	361	NM_027236	Eif1ad	2469	-45.53	-0.1293	1	361	28	388
NONMMUT149202.1	NONMMUG074954.2	423	NM_022964	Lat2	1636	-44.64	-0.1247	40	423	1	384
NONMMUT000121.2	NONMMUG000083.2	733	NM_001037759	Sgk3	5396	-24.89	-0.2705	617	733	1	117
NONMMUT011357.2	NONMMUG007173.2	214	NM_031386	Tex14	4763	-18.51	-0.1076	1	214	941	1154
NONMMUT029339.2	NONMMUG018142.2	403	NM_009995	Cyp21a1	1923	-39.8	-0.1067	1	403	656	1058
NONMMUT036899.2	NONMMUG022712.2	364	NM_001083126	Lhx6	3292	-37.34	-0.1052	1	364	134	497
NONMMUT044248.2	NONMMUG027311.2	388	NM_178212	H2ac19	1192	-322.77	-0.8916	1	388	586	973
NONMMUT046956.2	NONMMUG029023.2	362	NM_001305386	Pigo	3601	-35.74	-0.1024	1	362	2361	2722
NONMMUT053984.2	NONMMUG033468.2	308	NM_001004180	Fam222a	2693	-28.63	-0.1183	1	308	2341	2648
NONMMUT056816.2	NONMMUG035263.2	446	NM_001085415	Zfp467	3266	-59.34	-0.1506	1	446	1063	1508
NONMMUT060450.2	NONMMUG037574.3	234	NM_026042	Med29	2162	-24.65	-0.1126	1	234	1241	1474
NONMMUT066776.2	NONMMUG041330.2	356	NM_001363457	Fam192a	1797	-28.85	-0.1271	1	356	830	1185
NONMMUT067593.2	NONMMUG041876.2	227	NM_016925	Fanca	4541	-28.77	-0.1357	1	227	3074	3300
NONMMUT076088.1	NONMMUG047196.1	625	NM_001122675	Zcchc2	6663	-66.53	-0.1080	1	625	5685	6309
NONMMUT077602.1	NONMMUG000404.2	295	NM_001372416	Fam178b	2529	-30.31	-0.1110	1	295	1792	2086
NONMMUT096680.1	NONMMUG060433.1	278	NM_001358823	Zfr	4404	-25.23	-0.1009	1	278	1522	1799
NONMMUT097441.1	NONMMUG060924.2	383	NM_030229	Polr3h	2514	-36.37	-0.1063	1	383	2132	2514
NONMMUT106738.1	NONMMUG022210.2	863	NM_001355637	Acbd5	3756	-30.12	-0.1772	1	236	3521	3756
NONMMUT113599.1	NONMMUG071204.1	226	NM_020517	Lenep	668	-18.06	-0.1657	100	226	1	127
NONMMUT122332.1	NONMMUG076722.1	252	NM_001288620	Crhr2	2497	-27.89	-0.1148	1	252	2229	2480
NONMMUT124662.1	NONMMUG037091.2	207	NM_001164204	Tsen34	1555	-19.81	-0.1065	1	207	751	957
NONMMUT151161.1	NONMMUG094971.1	478	NM_001252522	Picalm	4043	-66.45	-0.1438	1	478	147	624
NONMMUT004342.2	NONMMUG002808.2	283	NM_144879	Vash2	4030	-24.89	-0.1068	1	283	1109	1391
NONMMUT023387.2	NONMMUG014468.2	580	NM_176998	Sybu	3230	-73.05	-0.1266	1	580	214	793
NONMMUT044248.2	NONMMUG027311.2	388	NM_022030	Sv2a	3917	-43.71	-0.1153	1	388	578	965
NONMMUT056817.2	NONMMUG035263.2	299	NM_133922	Krba1	7005	-41.91	-0.1426	1	299	993	1291
NONMMUT060450.2	NONMMUG037574.3	234	NM_007866	Dll3	2163	-41.33	-0.2850	1	158	2006	2163
NONMMUT070902.2	NONMMUG043911.2	230	NM_019750	Naa80	1499	-21.76	-0.1083	1	230	554	783
NONMMUT096052.1	NONMMUG014791.2	2278	NM_020498	Ly6i	1156	-127.08	-0.1155	355	1510	1	1156
NONMMUT100797.1	NONMMUG017693.2	694	NM_001033425	Zscan10	2735	-115.56	-0.1687	1	694	1937	2630
NONMMUT113599.1	NONMMUG071204.1	226	NM_001362376	Flad1	2429	-20.75	-0.1064	1	226	1999	2224
NONMMUT121213.1	NONMMUG033572.2	645	NM_021539	Wsb2	2404	-45.04	-0.1112	1	494	1911	2404
NONMMUT145776.1	NONMMUG091783.1	361	NM_011793	Banf1	974	-39.85	-0.1142	1	361	24	384
NONMMUT149202.1	NONMMUG074954.2	423	NM_020331	Gtf2ird1	3600	-49.99	-0.1501	65	423	1	359
NONMMUT151932.1	NONMMUG095404.1	461	NM_001276763	Brsk2	4112	-48.9	-0.1143	1	449	3664	4112
NONMMUT153193.1	NONMMUG042571.3	377	NM_011139	Pou2f3	2522	-39.12	-0.1096	1	377	218	594
NONMMUT023501.2	NONMMUG014537.2	290	NM_001081288	Taf2	5033	-24.36	-0.1144	1	290	3901	4190
NONMMUT033529.2	NONMMUG020632.2	559	NM_054042	Cd248	2562	-33.44	-0.1239	263	559	1	297
NONMMUT044248.2	NONMMUG027311.2	388	NM_013549	H2ac18	1112	-317.71	-0.9570	52	388	1	337
NONMMUT046947.2	NONMMUG029020.2	1274	NM_009503	Vcp	3315	-54.82	-0.1197	1	471	2845	3315
NONMMUT046950.2	NONMMUG029023.2	487	NM_023231	Stoml2	1548	-34.43	-0.1217	203	487	1	285
NONMMUT056817.2	NONMMUG035263.2	299	NM_133764	Atp6v0e2	1834	-28.87	-0.1050	1	299	116	414
NONMMUT060424.2	NONMMUG037558.2	335	NM_001374027	Zfp974	7291	-30.73	-0.1001	1	335	23	357
NONMMUT061080.2	NONMMUG037937.2	808	NM_133949	Ptov1	1764	-61.2	-0.1007	129	808	1	680
NONMMUT070902.2	NONMMUG043911.2	230	NM_019742	Tusc2	1661	-24.48	-0.1155	1	230	1366	1595
NONMMUT096052.1	NONMMUG014791.2	2278	NM_010741	Ly6c1	849	-176.89	-0.2106	669	1517	1	849
NONMMUT102760.1	NONMMUG019148.2	346	NM_180974	Foxn2	5092	-25.51	-0.2074	1	145	4948	5092
NONMMUT113599.1	NONMMUG071204.1	226	NM_001362375	Flad1	2244	-20.75	-0.1064	1	226	1814	2039
NONMMUT113648.1	NONMMUG027267.3	360	NM_199475	Mindy1	2834	-43.62	-0.1318	1	360	2113	2472
NONMMUT120843.1	NONMMUG033062.2	492	NM_029947	Prdm8	3119	-53.95	-0.1099	1	492	1049	1540
NONMMUT127904.1	NONMMUG039615.2	345	NM_026820	Ifitm1	676	-24.48	-0.1098	38	345	1	308
NONMMUT145776.1	NONMMUG091783.1	361	NM_001362454	Sf3b2	3232	-47.43	-0.1416	1	361	453	813
NONMMUT145813.1	NONMMUG020761.3	312	NM_001177347	1700092M07Rik	380	-20.97	-0.1121	1	220	161	380
NONMMUT149202.1	NONMMUG074954.2	423	NM_020044	Lat2	1672	-44.64	-0.1247	40	423	1	384
NONMMUT151932.1	NONMMUG095404.1	461	NM_001009930	Brsk2	4506	-48.9	-0.1143	1	449	4058	4506
NONMMUT044248.2	NONMMUG027311.2	388	NM_010186	Fcgr1	2589	-44.03	-0.1180	1	388	362	749
NONMMUT046955.2	NONMMUG029023.2	593	NM_021468	Unc13b	6408	-48.98	-0.2075	1	289	6120	6408
NONMMUT056817.2	NONMMUG035263.2	299	NM_027852	Rarres2	842	-28.15	-0.1039	1	299	439	737
NONMMUT060450.2	NONMMUG037574.3	234	NM_001290542	Plekhg2	5272	-25.77	-0.1251	1	234	3878	4111
NONMMUT070902.2	NONMMUG043911.2	230	NM_019720	Cyb561d2	1782	-21.66	-0.1078	1	230	400	629
NONMMUT071833.2	NONMMUG044508.2	255	NM_001242947	H2al1b	490	-23.62	-0.1074	1	255	47	301
NONMMUT096052.1	NONMMUG014791.2	2278	NM_010738	Ly6a	971	-163.12	-0.1685	545	1515	1	971
NONMMUT101928.1	NONMMUG017828.2	306	NM_026307	Cuta	710	-25.68	-0.1066	1	306	294	599
NONMMUT105059.1	NONMMUG065698.1	656	NM_001177438	Aldh3b2	2161	-65.39	-0.1001	1	656	1006	1661
NONMMUT106295.1	NONMMUG066424.1	653	NM_146099	Wbp1l	3878	-70.17	-0.1102	1	653	913	1565
NONMMUT113599.1	NONMMUG071204.1	226	NM_001355212	Zbtb7b	4132	-24.14	-0.1312	1	226	85	310
NONMMUT113648.1	NONMMUG027267.3	360	NM_173347	Prune1	3140	-39.76	-0.1262	1	360	216	575
NONMMUT127727.1	NONMMUG080175.1	648	NM_027363	Chp2	1171	-78.68	-0.1298	1	648	458	1105
NONMMUT145776.1	NONMMUG091783.1	361	NM_001362451	Pacs1	4214	-56.32	-0.1637	1	361	77	437
NONMMUT151932.1	NONMMUG095404.1	461	NM_001009929	Brsk2	4141	-48.9	-0.1143	1	449	3693	4141
NONMMUT152852.1	NONMMUG095865.1	603	NM_027022	Cmtm2a	1084	-140.78	-0.2386	1	603	447	1049
NONMMUT008502.2	NONMMUG005256.3	1198	NM_001362716	Tbrg4	2552	-119.68	-0.1002	1	1198	4	1201
NONMMUT012873.2	NONMMUG008170.2	504	NM_001361587	Mfsd11	2918	-45.08	-0.1015	1	504	776	1279
NONMMUT027929.2	NONMMUG017311.2	3194	NM_001362093	B230307C23Rik	2850	-949.5	-0.3424	250	3099	1	2850
NONMMUT043950.2	NONMMUG027118.2	227	NM_183037	Trim46	3122	-34.2	-0.1621	1	227	1151	1377
NONMMUT044248.2	NONMMUG027311.2	388	NM_001025613	Otud7b	8101	-41.21	-0.1138	1	388	6977	7364
NONMMUT045455.2	NONMMUG028051.2	202	NM_011932	Dapp1	3087	-18.82	-0.1082	1	202	43	244
NONMMUT056817.2	NONMMUG035263.2	299	NM_001362145	Krba1	6664	-41.91	-0.1426	1	299	993	1291
NONMMUT060450.2	NONMMUG037574.3	234	NM_001141921	Lrfn1	2584	-24.38	-0.1238	1	234	2322	2555
NONMMUT070902.2	NONMMUG043911.2	230	NM_019704	Tmem115	2177	-23.09	-0.1319	1	230	1034	1263
NONMMUT071833.2	NONMMUG044508.2	255	NM_001111037	H2al1a	1002	-23.62	-0.1074	1	255	552	806
NONMMUT091578.1	NONMMUG011201.2	833	NM_001136496	Zfp935	2411	-83.9	-0.1065	1	833	1420	2252
NONMMUT101928.1	NONMMUG017828.2	306	NM_008700	Nkx2-5	1524	-35.07	-0.1197	1	306	344	649
NONMMUT106295.1	NONMMUG066424.1	653	NM_053100	Trim8	3241	-67.41	-0.1039	1	653	2504	3156
NONMMUT113599.1	NONMMUG071204.1	226	NM_001355206	Zbtb7b	4333	-24.14	-0.1312	1	226	85	310
NONMMUT113648.1	NONMMUG027267.3	360	NM_172395	Cdc42se1	3128	-45.21	-0.1314	1	360	2647	3006
NONMMUT127727.1	NONMMUG080175.1	648	NM_011121	Plk1	2214	-88.92	-0.1407	1	648	259	906
NONMMUT127904.1	NONMMUG039615.2	345	NM_019762	Pkp3	2839	-33.53	-0.1054	1	345	1743	2087
NONMMUT129217.1	NONMMUG081132.1	231	NM_009209	Slc6a2	6073	-21.2	-0.1152	1	231	5630	5860
NONMMUT141011.1	NONMMUG088976.1	202	NM_178616	Psmd11	1743	-20.4	-0.1146	1	202	1524	1725
NONMMUT145776.1	NONMMUG091783.1	361	NM_001038231	Banf1	766	-33.3	-0.1006	1	361	87	447
NONMMUT149202.1	NONMMUG074954.2	423	NM_009990	Clip2	4998	-63.84	-0.1740	1	423	190	612
NONMMUT012194.2	NONMMUG007719.2	1537	NM_001357580	Higd1b	529	-41.28	-0.1131	1106	1537	1	432
NONMMUT024064.2	NONMMUG014868.2	260	NM_025536	Commd5	998	-25.83	-0.1169	1	260	633	892
NONMMUT027049.2	NONMMUG016772.2	216	NM_001252451	Cldnd1	2049	-18.32	-0.1443	1	163	1887	2049
NONMMUT028120.2	NONMMUG017416.2	479	NM_001364952	Rnaset2a	868	-50.96	-0.1930	1	270	599	868
NONMMUT036901.2	NONMMUG022712.2	309	NM_001355125	Lhx6	3346	-35.52	-0.1204	1	309	94	402
NONMMUT043950.2	NONMMUG027118.2	227	NM_008094	Gba	2142	-22.66	-0.1150	1	227	127	353
NONMMUT050859.2	NONMMUG031526.2	335	NM_001033455	Ccdc27	2084	-34.62	-0.1065	1	335	1492	1826
NONMMUT056817.2	NONMMUG035263.2	299	NM_001085415	Zfp467	3266	-36.02	-0.1259	1	299	1657	1955
NONMMUT057351.2	NONMMUG035606.2	405	NM_010121	Eif2ak3	4509	-34.76	-0.1010	1	405	4006	4410
NONMMUT063765.2	NONMMUG039382.2	281	NM_172748	Fbxl19	3410	-36.41	-0.1310	1	281	199	479
NONMMUT070902.2	NONMMUG043911.2	230	NM_001291539	Sema3b	3687	-24.5	-0.1150	1	230	2209	2438
NONMMUT078858.1	NONMMUG049065.1	255	NM_011439	Sox13	3531	-33.7	-0.1478	1	255	358	612
NONMMUT085736.1	NONMMUG053379.1	236	NM_008942	Npepps	4155	-22.7	-0.1188	1	236	35	270
NONMMUT105807.1	NONMMUG066133.2	239	NM_054042	Cd248	2562	-26.58	-0.1126	1	239	2133	2371
NONMMUT113648.1	NONMMUG027267.3	360	NM_001085383	Anxa9	1874	-32.36	-0.1054	1	360	1098	1457
NONMMUT121645.1	NONMMUG034325.3	324	NM_001359056	Gpr12	2471	-35.59	-0.1215	1	324	212	535
NONMMUT124726.1	NONMMUG078179.1	478	NM_001081418	Bicra	5360	-51.62	-0.1179	1	478	2433	2910
NONMMUT141976.1	NONMMUG089467.1	666	NM_001272056	Numb	3432	-68.63	-0.1089	1	666	1055	1720
NONMMUT149202.1	NONMMUG074954.2	423	NM_001081463	Gtf2ird1	4610	-49.99	-0.1501	65	423	1	359
NONMMUT150866.1	NONMMUG037574.3	471	NM_007866	Dll3	2163	-46.75	-0.1027	1	471	465	935
NONMMUT151929.1	NONMMUG095401.1	300	NM_028050	Lmntd2	2047	-30.49	-0.1349	1	276	1772	2047
NONMMUT151956.1	NONMMUG095418.1	254	NM_001364168	Ccdc114	2598	-27.82	-0.1131	1	254	588	841
NONMMUT036899.2	NONMMUG022712.2	364	NM_001355125	Lhx6	3346	-37.34	-0.1052	1	364	134	497
NONMMUT044248.2	NONMMUG027311.2	388	NM_178215	H3c13	502	-50.47	-0.1406	1	388	80	467
NONMMUT046951.2	NONMMUG029023.2	551	NM_001355438	Dnajb5	3561	-44.96	-0.1046	88	551	1	464
NONMMUT060450.2	NONMMUG037574.3	234	NM_175021	Samd4b	4391	-25.67	-0.1316	1	234	4063	4296
NONMMUT066776.2	NONMMUG041330.2	356	NM_153507	Cpne2	2302	-32.82	-0.1087	53	356	1	304
NONMMUT067593.2	NONMMUG041876.2	227	NM_030176	Spata2l	2432	-28.25	-0.1412	1	227	2158	2384
NONMMUT077602.1	NONMMUG000404.2	295	NM_009539	Zap70	2247	-32.58	-0.1112	1	295	1360	1654
NONMMUT104716.1	NONMMUG020091.2	321	NM_007420	Adrb2	2269	-26.63	-0.1036	27	321	1	295
NONMMUT111830.1	NONMMUG070013.1	252	NM_027533	Tspan2	4261	-22.74	-0.1126	25	252	1	228
NONMMUT113252.1	NONMMUG026570.2	300	NM_001004176	Maml3	6512	-38.29	-0.1507	1	300	2621	2920
NONMMUT117543.1	NONMMUG073725.1	449	NM_023536	Mrto4	1213	-45.04	-0.1012	1	449	2	450
NONMMUT119392.1	NONMMUG074888.1	271	NM_021430	Rilpl1	2249	-29.51	-0.1272	1	271	1786	2056
NONMMUT122332.1	NONMMUG076722.1	252	NM_172729	Nod1	4322	-24.45	-0.1164	1	252	2651	2902
NONMMUT124662.1	NONMMUG037091.2	207	NM_001290377	Oscar	1827	-24.8	-0.1246	1	207	1346	1552
NONMMUT144831.1	NONMMUG091214.1	694	NM_001166537	Hmga1	1971	-67.39	-0.1024	1	676	1296	1971
NONMMUT146014.1	NONMMUG066133.2	630	NM_054042	Cd248	2562	-60.69	-0.1209	107	630	1	524
NONMMUT146159.1	NONMMUG092007.1	318	NM_001277100	Add3	4511	-33.28	-0.1251	1	318	4070	4387
NONMMUT149203.1	NONMMUG074954.2	422	NM_001081468	Gtf2ird1	3306	-39.66	-0.1120	1	422	721	1142
NONMMUT151161.1	NONMMUG094971.1	478	NM_001289583	Sytl2	4779	-60.37	-0.1357	1	476	4304	4779
NONMMUT151929.1	NONMMUG095401.1	300	NM_001081118	Phrf1	5374	-34.26	-0.1264	1	300	1616	1915
NONMMUT152853.1	NONMMUG095865.1	507	NM_027022	Cmtm2a	1084	-144.84	-0.2920	1	507	447	953
NONMMUT000108.2	NONMMUG000077.3	1494	NM_133220	Sgk3	5515	-53.21	-0.1071	1	546	4970	5515
NONMMUT029760.2	NONMMUG018383.2	792	NM_001271631	Runx2	5724	-97.67	-0.1278	1	792	142	933
NONMMUT044248.2	NONMMUG027311.2	388	NM_181409	Mtmr11	2812	-39.16	-0.1079	1	388	1310	1697
NONMMUT050857.2	NONMMUG031526.2	400	NM_001126331	Trp73	4468	-41.43	-0.1049	1	400	1143	1542
NONMMUT053870.2	NONMMUG033405.2	374	NM_001253917	Sez6l	5882	-34.58	-0.1017	1	374	1341	1714
NONMMUT063001.2	NONMMUG038883.3	613	NM_025605	Lamtor1	1186	-46.69	-0.1219	113	613	1	501
NONMMUT067593.2	NONMMUG041876.2	227	NM_172287	Spire2	2333	-25.14	-0.1453	1	187	2147	2333
NONMMUT072850.2	NONMMUG045145.2	604	NM_001358380	Atp6ap1	2255	-32.12	-0.1300	342	604	1	263
NONMMUT077602.1	NONMMUG000404.2	295	NM_018872	Tmem131	6548	-31.68	-0.1252	1	295	153	447
NONMMUT083937.1	NONMMUG052265.1	803	NM_001362744	Srr	5587	-45.44	-0.1090	364	803	1	440
NONMMUT113599.1	NONMMUG071204.1	226	NM_080466	Kcnn3	7617	-21.01	-0.1030	1	226	4609	4834
NONMMUT115798.1	NONMMUG072602.1	615	NM_001369177	Ece1	4656	-102.55	-0.1678	1	615	197	811
NONMMUT124905.1	NONMMUG037680.2	528	NM_001364010	Krtdap	409	-19.64	-0.1907	1	107	303	409
NONMMUT134324.1	NONMMUG084661.1	381	NM_001361107	1110032A03Rik	3199	-53.84	-0.1538	1	381	1193	1573
NONMMUT139417.1	NONMMUG088078.1	253	NM_001013370	Sesn1	2612	-30.86	-0.1239	1	253	2339	2591
NONMMUT143307.1	NONMMUG090236.1	686	NM_134082	Farp1	4857	-98.5	-0.1455	1	686	61	746
NONMMUT146159.1	NONMMUG092007.1	318	NM_001360345	Mxi1	2564	-28.28	-0.1169	1	245	2320	2564
NONMMUT148089.1	NONMMUG029675.3	357	NM_008687	Nfib	8903	-35.81	-0.1105	1	357	416	772
NONMMUT151929.1	NONMMUG095401.1	300	NM_001130443	Hras	2190	-35.58	-0.1266	1	300	14	313
NONMMUT004501.2	NONMMUG002899.2	256	NM_013499	Cr1l	1662	-27.03	-0.1112	1	256	244	499
NONMMUT028558.2	NONMMUG017675.2	6023	NM_001362121	Gm9805	2341	-436.83	-0.1885	3181	5521	1	2341
NONMMUT044246.2	NONMMUG027311.2	847	NM_026975	Bola1	729	-38.51	-0.1067	472	847	1	376
NONMMUT046956.2	NONMMUG029023.2	362	NM_020035	Pigo	4266	-35.74	-0.1024	1	362	3026	3387
NONMMUT050616.2	NONMMUG031367.2	562	NM_019781	Pex14	1973	-55.41	-0.1006	1	562	1280	1841
NONMMUT050810.2	NONMMUG031505.2	318	NM_001033489	Rnf207	2479	-26.42	-0.1008	1	318	416	733
NONMMUT050857.2	NONMMUG031526.2	400	NM_007859	Dffb	2048	-38.16	-0.1045	1	400	894	1293
NONMMUT056816.2	NONMMUG035263.2	446	NM_001355747	Zfp467	3446	-59.34	-0.1506	1	446	1243	1688
NONMMUT058414.2	NONMMUG036291.2	606	NM_001372393	Tada3	2075	-52.95	-0.1014	1	606	1433	2038
NONMMUT061197.2	NONMMUG038000.3	374	NM_001289693	Ntn5	1761	-41.32	-0.1245	1	374	963	1336
NONMMUT067031.2	NONMMUG041499.3	666	NM_001368316	Sntb2	4288	-91.11	-0.1378	1	666	3592	4257
NONMMUT070901.2	NONMMUG043911.2	1499	NM_019742	Tusc2	1661	-80.81	-0.1159	1	707	955	1661
NONMMUT076272.1	NONMMUG047313.2	273	NM_001081078	Lct	6174	-27.17	-0.1100	1	273	4919	5191
NONMMUT085172.1	NONMMUG053054.2	207	NM_001362725	Zfp62	4139	-21.75	-0.1310	1	207	3470	3676
NONMMUT093313.1	NONMMUG013483.2	576	NM_001310646	Tsc22d1	5002	-63.01	-0.1156	1	576	4375	4950
NONMMUT094587.1	NONMMUG013356.2	257	NM_023045	Xpo7	7238	-27.78	-0.1246	1	257	1433	1689
NONMMUT105807.1	NONMMUG066133.2	239	NM_001001885	Tmem151a	3945	-24.51	-0.1645	74	239	1	166
NONMMUT124895.1	NONMMUG078289.2	689	NM_001290573	Kmt2b	8484	-68.97	-0.1055	1	689	5151	5839
NONMMUT139417.1	NONMMUG088078.1	253	NM_026643	Cep57l1	2151	-26.01	-0.1097	1	253	545	797
NONMMUT145601.1	NONMMUG091684.1	821	NM_008214	Hars	1989	-161.76	-0.2259	57	821	1	765
NONMMUT149203.1	NONMMUG074954.2	422	NM_009990	Clip2	4998	-40.02	-0.1048	1	422	3581	4002
NONMMUT151161.1	NONMMUG094971.1	478	NM_031394	Sytl2	4659	-60.37	-0.1357	1	476	4184	4659
NONMMUT154065.1	NONMMUG096395.1	626	NM_001276486	Dag1	5435	-60.38	-0.1005	1	626	1305	1930
NONMMUT006436.2	NONMMUG004147.2	1143	NM_001359149	Lsm7	574	-42.44	-0.1006	1	522	53	574
NONMMUT008502.2	NONMMUG005256.3	1198	NM_001362714	Tbrg4	2474	-118.36	-0.1017	1	1198	4	1201
NONMMUT011353.2	NONMMUG007170.2	214	NM_177167	Ppm1e	6315	-32.11	-0.1622	1	214	5783	5996
NONMMUT012873.2	NONMMUG008170.2	504	NM_001361585	Mfsd11	3085	-45.08	-0.1015	1	504	776	1279
NONMMUT021419.2	NONMMUG013297.2	215	NM_173420	Synb	6002	-28.84	-0.1696	1	215	5352	5566
NONMMUT043950.2	NONMMUG027118.2	227	NM_025327	Krtcap2	523	-21.7	-0.1119	1	210	314	523
NONMMUT045455.2	NONMMUG028051.2	202	NM_001310753	Dapp1	2964	-18.82	-0.1082	1	202	43	244
NONMMUT050859.2	NONMMUG031526.2	335	NM_177673	Cep104	3277	-39.56	-0.1225	1	335	1987	2321
NONMMUT053224.2	NONMMUG033062.2	684	NM_029947	Prdm8	3119	-163.03	-0.2441	1	684	966	1649
NONMMUT056715.2	NONMMUG035221.2	350	NM_001355550	Cul1	3373	-34.79	-0.1084	1	350	32	381
NONMMUT056817.2	NONMMUG035263.2	299	NM_001355747	Zfp467	3446	-36.02	-0.1259	1	299	1657	1955
NONMMUT066774.2	NONMMUG041330.2	401	NM_153507	Cpne2	2302	-31.9	-0.1346	1	246	2057	2302
NONMMUT070902.2	NONMMUG043911.2	230	NM_010489	Hyal2	1849	-23.56	-0.1057	1	230	808	1037
NONMMUT083998.1	NONMMUG052303.1	313	NM_001348207	Ksr1	5261	-35.42	-0.1270	1	313	4740	5052
NONMMUT096052.1	NONMMUG014791.2	2278	NM_001357693	Ly6c2	820	-184.28	-0.2360	693	1512	1	820
NONMMUT105806.1	NONMMUG020632.2	503	NM_001302333	Cnih2	1369	-35.75	-0.1114	160	503	1	344
NONMMUT113648.1	NONMMUG027267.3	360	NM_133858	Mindy1	2807	-43.62	-0.1318	1	360	2086	2445
NONMMUT127727.1	NONMMUG080175.1	648	NM_001316689	Ern2	2985	-87.22	-0.1361	1	648	1451	2098
NONMMUT129217.1	NONMMUG081132.1	231	NM_001081372	Ces1b	1965	-18.19	-0.1205	1	231	1703	1933
NONMMUT133957.1	NONMMUG084415.1	388	NM_152808	Slc44a2	3459	-41.7	-0.1149	1	388	1924	2311
NONMMUT141011.1	NONMMUG088976.1	202	NM_027472	5730455P16Rik	4536	-21.88	-0.1105	1	202	2996	3197
NONMMUT149202.1	NONMMUG074954.2	423	NM_001312867	Eif4h	2434	-48.21	-0.1259	1	423	1526	1948
NONMMUT150866.1	NONMMUG037574.3	471	NM_175021	Samd4b	4391	-49.99	-0.1113	1	471	593	1063
NONMMUT151643.1	NONMMUG095247.1	969	NM_001285518	Nr1h2	2009	-89.56	-0.1004	1	969	101	1069
NONMMUT002342.2	NONMMUG001576.3	607	NM_008381	Inhbb	4257	-66.17	-0.1143	1	607	590	1196
NONMMUT004501.2	NONMMUG002899.2	256	NM_133654	Cd34	2465	-24.74	-0.1044	1	256	1489	1744
NONMMUT008054.2	NONMMUG004979.3	592	NM_001355005	Cdk4	1186	-36.52	-0.1246	1	304	883	1186
NONMMUT021973.2	NONMMUG013648.2	1071	NM_029320	Pibf1	3281	-57.08	-0.1063	1	589	2693	3281
NONMMUT031173.2	NONMMUG019198.2	14867	NM_001024731	Gm20939	2491	-524.18	-0.2114	4715	7205	1	2491
NONMMUT036900.2	NONMMUG022712.2	227	NM_001083125	Lhx6	3378	-44.96	-0.2366	1	227	98	324
NONMMUT043950.2	NONMMUG027118.2	227	NM_001014995	Fam189b	3143	-25.71	-0.1213	1	227	2275	2501
NONMMUT046956.2	NONMMUG029023.2	362	NM_021468	Unc13b	6408	-32.19	-0.1009	1	362	5806	6167
NONMMUT050857.2	NONMMUG031526.2	400	NM_011642	Trp73	4710	-41.78	-0.1074	1	400	1388	1787
NONMMUT066778.2	NONMMUG041330.2	337	NM_001033207	Nlrc5	6945	-34.9	-0.1061	1	337	2841	3177
NONMMUT072850.2	NONMMUG045145.2	604	NM_018794	Atp6ap1	2189	-32.12	-0.1300	342	604	1	263
NONMMUT076272.1	NONMMUG047313.2	273	NM_001313695	Mcm6	4431	-26	-0.1275	1	211	4221	4431
NONMMUT085172.1	NONMMUG053054.2	207	NM_001362726	Zfp62	4000	-21.75	-0.1310	1	207	3470	3676
NONMMUT105062.1	NONMMUG020600.2	427	NM_011237	Rad9a	2046	-37.33	-0.1012	1	427	805	1231
NONMMUT105807.1	NONMMUG066133.2	239	NM_001302333	Cnih2	1369	-30.03	-0.1329	1	239	1106	1344
NONMMUT106809.1	NONMMUG022514.2	556	NM_001242407	Miga2	3379	-54.46	-0.1028	1	556	923	1478
NONMMUT131791.1	NONMMUG082951.1	751	NM_146219	Klhl36	2142	-66.42	-0.1014	85	751	1	667
NONMMUT139417.1	NONMMUG088078.1	253	NM_029132	Cep57l1	2306	-27.6	-0.1243	1	253	613	865
NONMMUT151161.1	NONMMUG094971.1	478	NM_146194	Picalm	4193	-66.45	-0.1438	1	478	147	624
NONMMUT151929.1	NONMMUG095401.1	300	NM_001252600	Irf7	1766	-30.14	-0.1129	1	300	264	563
NONMMUT152738.1	NONMMUG095800.1	320	NM_001024954	Pbx4	1427	-30.23	-0.1229	71	320	1	250
NONMMUT154065.1	NONMMUG096395.1	626	NM_001276492	Dag1	5582	-60.38	-0.1005	1	626	1452	2077
NONMMUT013071.2	NONMMUG008285.3	6575	NM_001110242	Ndufaf8	494	-60.42	-0.1256	2903	3396	1	494
NONMMUT026438.2	NONMMUG016370.2	402	NM_198645	Ccdc58	1096	-31.94	-0.1058	1	402	33	434
NONMMUT029760.2	NONMMUG018383.2	792	NM_001271630	Runx2	5829	-97.67	-0.1278	1	792	142	933
NONMMUT044248.2	NONMMUG027311.2	388	NM_178216	H3c14	1328	-60.01	-0.1575	1	388	82	469
NONMMUT050857.2	NONMMUG031526.2	400	NM_001126330	Trp73	4756	-41.78	-0.1074	1	400	1431	1830
NONMMUT053870.2	NONMMUG033405.2	374	NM_001253916	Sez6l	6080	-34.58	-0.1017	1	374	1341	1714
NONMMUT060450.2	NONMMUG037574.3	234	NM_175033	Selenov	1267	-25.09	-0.1115	1	234	824	1057
NONMMUT061197.2	NONMMUG038000.3	374	NM_001163662	Nucb1	2639	-35.83	-0.1175	1	323	2317	2639
NONMMUT063001.2	NONMMUG038883.3	613	NM_010567	Inppl1	4992	-61	-0.1093	1	613	3650	4262
NONMMUT067593.2	NONMMUG041876.2	227	NM_145606	Chmp1a	2171	-34.74	-0.1711	1	227	460	686
NONMMUT077602.1	NONMMUG000404.2	295	NM_009942	Cox5b	569	-23.57	-0.1067	1	258	312	569
NONMMUT106738.1	NONMMUG022210.2	863	NM_001355642	Acbd5	3602	-30.12	-0.1772	1	236	3367	3602
NONMMUT113252.1	NONMMUG026570.2	300	NM_019739	Foxo1	5552	-40.29	-0.1380	1	300	153	452
NONMMUT124905.1	NONMMUG037680.2	528	NM_001364009	Krtdap	367	-19.64	-0.1907	1	107	261	367
NONMMUT134324.1	NONMMUG084661.1	381	NM_001311073	1110032A03Rik	3175	-53.84	-0.1538	1	381	1169	1549
NONMMUT148089.1	NONMMUG029675.3	357	NM_001286131	Nfib	8992	-35.81	-0.1105	1	357	416	772
NONMMUT151161.1	NONMMUG094971.1	478	NM_001289584	Sytl2	4698	-60.37	-0.1357	1	476	4223	4698
NONMMUT151929.1	NONMMUG095401.1	300	NM_001114322	Cdhr5	2629	-34.91	-0.1168	1	300	2119	2418
NONMMUT011357.2	NONMMUG007173.2	214	NM_053269	Rad51c	3926	-17.98	-0.1064	1	214	1623	1836
NONMMUT019875.2	NONMMUG012331.2	2372	NM_025366	Chchd1	595	-28.49	-0.1261	2131	2372	1	242
NONMMUT029760.2	NONMMUG018383.2	792	NM_001145920	Runx2	6475	-101.82	-0.1309	1	792	424	1215
NONMMUT036575.2	NONMMUG022514.2	556	NM_001242407	Miga2	3379	-54.46	-0.1028	1	556	922	1477
NONMMUT036899.2	NONMMUG022712.2	364	NM_001083127	Lhx6	3188	-37.34	-0.1052	1	364	134	497
NONMMUT044248.2	NONMMUG027311.2	388	NM_178213	H2ac21	469	-67.4	-0.2654	106	388	1	283
NONMMUT056074.2	NONMMUG034839.2	901	NM_021414	Ahcyl2	5201	-50.59	-0.1134	1	473	4729	5201
NONMMUT056816.2	NONMMUG035263.2	446	NM_001085416	Zfp467	3169	-59.34	-0.1506	1	446	966	1411
NONMMUT060450.2	NONMMUG037574.3	234	NM_030562	Lrfn1	1723	-22.2	-0.1721	1	146	1578	1723
NONMMUT067593.2	NONMMUG041876.2	227	NM_020497	Zfp276	4877	-25.55	-0.1194	1	227	1860	2086
NONMMUT076088.1	NONMMUG047196.1	625	NM_001122676	Zcchc2	5801	-66.53	-0.1080	1	625	4823	5447
NONMMUT077602.1	NONMMUG000404.2	295	NM_001372417	Fam178b	2367	-30.31	-0.1110	1	295	1630	1924
NONMMUT093312.1	NONMMUG013483.2	555	NM_001310646	Tsc22d1	5002	-61.71	-0.1132	1	555	63	617
NONMMUT096680.1	NONMMUG060433.1	278	NM_011294	Sub1	3321	-25.51	-0.1016	1	278	2328	2605
NONMMUT102688.1	NONMMUG019129.3	2479	NM_029298	Stpg4	847	-39.74	-0.1113	2082	2479	1	398
NONMMUT117543.1	NONMMUG073725.1	449	NM_001290810	Mrto4	1216	-45.04	-0.1012	1	449	2	450
NONMMUT122332.1	NONMMUG076722.1	252	NM_009953	Crhr2	2697	-25.63	-0.1114	1	252	210	461
NONMMUT124662.1	NONMMUG037091.2	207	NM_001164205	Tsen34	1468	-19.81	-0.1065	1	207	664	870
NONMMUT146159.1	NONMMUG092007.1	318	NM_001164100	Add3	4415	-33.28	-0.1251	1	318	3974	4291
NONMMUT151161.1	NONMMUG094971.1	478	NM_001252523	Picalm	4028	-66.45	-0.1438	1	478	147	624
NONMMUT004501.2	NONMMUG002899.2	256	NM_001111059	Cd34	2621	-24.74	-0.1044	1	256	1645	1900
NONMMUT036575.2	NONMMUG022514.2	556	NM_001346806	Sh3glb2	1869	-56.77	-0.1049	1	556	750	1305
NONMMUT054918.2	NONMMUG034075.2	1164	NM_027356	Ufsp1	996	-51.74	-0.1021	572	1164	1	593
NONMMUT061197.2	NONMMUG038000.3	374	NM_001271578	Sec1	2470	-37.05	-0.1021	1	374	426	799
NONMMUT067593.2	NONMMUG041876.2	227	NM_177279	Spata33	518	-17.42	-0.1069	1	227	48	274
NONMMUT085172.1	NONMMUG053054.2	207	NM_001024846	Zfp62	4235	-21.75	-0.1310	1	207	3470	3676
NONMMUT094587.1	NONMMUG013356.2	257	NM_001302094	Gfra2	3172	-26.39	-0.1068	1	257	591	847
NONMMUT105059.1	NONMMUG065698.1	656	NM_028545	Aldh3b3	1999	-70.93	-0.1086	1	656	1024	1679
NONMMUT105062.1	NONMMUG020600.2	427	NM_001001984	Kdm2a	7265	-44.94	-0.1057	1	427	6788	7214
NONMMUT113599.1	NONMMUG071204.1	226	NM_146131	Pbxip1	4481	-26.96	-0.1284	1	226	2789	3014
NONMMUT115798.1	NONMMUG072602.1	615	NM_001369178	Ece1	4725	-102.55	-0.1678	1	615	197	811
NONMMUT119392.1	NONMMUG074888.1	271	NM_030241	Kmt5a	2742	-27.47	-0.1477	44	271	1	228
NONMMUT123302.1	NONMMUG036949.2	1142	NM_001163628	Etfrf1	1623	-32.44	-0.1020	1	331	1293	1623
NONMMUT124905.1	NONMMUG037680.2	528	NM_001364011	Krtdap	420	-19.64	-0.1907	1	107	314	420
NONMMUT129714.1	NONMMUG081497.1	440	NM_001272041	Acta1	1571	-44.61	-0.1016	1	440	544	983
NONMMUT134324.1	NONMMUG084661.1	381	NM_001361108	1110032A03Rik	3037	-53.84	-0.1538	1	381	1031	1411
NONMMUT139417.1	NONMMUG088078.1	253	NM_001162908	Sesn1	3182	-25.19	-0.1037	1	253	1886	2138
NONMMUT143307.1	NONMMUG090236.1	686	NM_145465	Stk24	2574	-102.4	-0.1766	103	686	1	584
NONMMUT146159.1	NONMMUG092007.1	318	NM_001360346	Mxi1	2471	-31.55	-0.1111	1	318	2109	2426
NONMMUT149147.1	NONMMUG093797.1	576	NM_001359153	Atxn2	5886	-109.54	-0.2204	1	514	5373	5886
NONMMUT151929.1	NONMMUG095401.1	300	NM_001130444	Hras	2272	-35.58	-0.1266	1	300	14	313
NONMMUT006300.2	NONMMUG004054.2	1222	NM_001205035	Gm10142	399	-40.16	-0.1027	39	437	1	399
NONMMUT009430.2	NONMMUG005880.2	631	NM_028862	Rnf145	3578	-29.7	-0.1017	1	346	3233	3578
NONMMUT020727.2	NONMMUG012897.2	421	NM_001310505	Pip4p1	1587	-27.37	-0.1113	168	421	1	254
NONMMUT036575.2	NONMMUG022514.2	556	NM_001289709	Sh3glb2	1857	-56.77	-0.1049	1	556	738	1293
NONMMUT042600.2	NONMMUG026381.2	3353	NM_001205361	Dcun1d1	4474	-33.78	-0.1624	1	233	4242	4474
NONMMUT046956.2	NONMMUG029023.2	362	NM_001310758	Unc13b	6372	-32.19	-0.1009	1	362	5770	6131
NONMMUT051494.2	NONMMUG031919.2	345	NM_001289780	Pus7	3908	-31.5	-0.1400	55	345	1	291
NONMMUT053984.2	NONMMUG033468.2	308	NM_022017	Trpv4	3226	-30.32	-0.1028	1	308	759	1066
NONMMUT060450.2	NONMMUG037574.3	234	NM_138752	Plekhg2	5052	-25.77	-0.1251	1	234	3878	4111
NONMMUT063001.2	NONMMUG038883.3	613	NM_008887	Phox2a	1609	-70.71	-0.1263	1	613	536	1148
NONMMUT066776.2	NONMMUG041330.2	356	NM_028221	Fam192a	1799	-33.97	-0.1222	1	356	832	1187
NONMMUT067593.2	NONMMUG041876.2	227	NM_028200	Vps9d1	2826	-29.45	-0.1416	1	227	1008	1234
NONMMUT077602.1	NONMMUG000404.2	295	NM_001374322	4933424G06Rik	1127	-27.34	-0.1243	1	295	358	652
NONMMUT083937.1	NONMMUG052265.1	803	NM_001163311	Srr	5955	-50.62	-0.1197	364	803	1	440
NONMMUT096680.1	NONMMUG060433.1	278	NM_011767	Zfr	4596	-25.23	-0.1009	1	278	1522	1799
NONMMUT097441.1	NONMMUG060924.2	383	NM_145473	Csdc2	2490	-32.59	-0.1140	1	383	374	756
NONMMUT104042.1	NONMMUG065051.1	719	NM_008448	Kif5b	6030	-76.07	-0.1061	1	719	4616	5334
NONMMUT117543.1	NONMMUG073725.1	449	NM_001356476	Mrto4	1238	-48.84	-0.1133	1	449	2	450
NONMMUT151161.1	NONMMUG094971.1	478	NM_001252524	Picalm	4004	-66.45	-0.1438	1	478	147	624
NONMMUT004734.2	NONMMUG003051.3	1182	NM_175102	Sf3b5	734	-62.25	-0.1604	786	1182	1	397
NONMMUT008502.2	NONMMUG005256.3	1198	NM_001362715	Tbrg4	3343	-119.68	-0.1002	1	1198	4	1201
NONMMUT012873.2	NONMMUG008170.2	504	NM_001361586	Mfsd11	2915	-45.08	-0.1015	1	504	776	1279
NONMMUT033790.2	NONMMUG020761.3	2728	NM_008577	Slc3a2	2572	-67.44	-0.1069	1	636	1937	2572
NONMMUT039889.2	NONMMUG024685.2	1309	NM_009732	Avp	611	-51.63	-0.1010	1	561	51	611
NONMMUT043950.2	NONMMUG027118.2	227	NM_026767	Dpm3	497	-23.97	-0.1198	1	221	277	497
NONMMUT050859.2	NONMMUG031526.2	335	NM_201226	Lrrc47	3395	-43.52	-0.1364	1	335	2976	3310
NONMMUT056817.2	NONMMUG035263.2	299	NM_001362144	Krba1	8762	-41.91	-0.1426	1	299	993	1291
NONMMUT060450.2	NONMMUG037574.3	234	NM_001083912	Plekhg2	5049	-25.77	-0.1251	1	234	3878	4111
NONMMUT065992.2	NONMMUG040832.2	414	NM_001024922	Ddx49	2100	-37.64	-0.1004	1	414	1562	1975
NONMMUT070902.2	NONMMUG043911.2	230	NM_018879	Nprl2	1458	-20.91	-0.1051	1	230	429	658
NONMMUT071833.2	NONMMUG044508.2	255	NM_001025260	H2al1e	494	-23.62	-0.1074	1	255	51	305
NONMMUT083998.1	NONMMUG052303.1	313	NM_013571	Ksr1	5561	-35.42	-0.1270	1	313	5040	5352
NONMMUT096052.1	NONMMUG014791.2	2278	NM_001358005	Ly6i	898	-120.02	-0.1405	613	1510	1	898
NONMMUT096525.1	NONMMUG060329.1	1415	NM_033476	Tfcp2	3301	-62.97	-0.2217	1	301	3001	3301
NONMMUT102760.1	NONMMUG019148.2	346	NM_001355743	Foxn2	5023	-25.51	-0.2074	1	145	4879	5023
NONMMUT113648.1	NONMMUG027267.3	360	NM_134253	Bnipl	1788	-39	-0.1127	1	360	167	526
NONMMUT113720.1	NONMMUG027443.3	379	NM_207205	Igsf3	7330	-37.12	-0.1055	1	379	5005	5383
NONMMUT127727.1	NONMMUG080175.1	648	NM_008855	Prkcb	8829	-67.83	-0.1089	1	648	7143	7790
NONMMUT127904.1	NONMMUG039615.2	345	NM_013782	Ptdss2	2172	-34.89	-0.1057	1	345	1394	1738
NONMMUT141011.1	NONMMUG088976.1	202	NM_177390	Myo1d	5353	-28.04	-0.1566	1	202	150	351
NONMMUT145776.1	NONMMUG091783.1	361	NM_001024717	Gal3st3	2422	-61.4	-0.1806	1	361	1073	1433
NONMMUT148734.1	NONMMUG073684.2	2694	NM_010178	Srsf10	3421	-50.82	-0.1014	1	526	2896	3421
NONMMUT149202.1	NONMMUG074954.2	423	NM_001347488	Gtf2ird1	4553	-49.99	-0.1501	65	423	1	359
NONMMUT150866.1	NONMMUG037574.3	471	NM_175033	Selenov	1267	-49.44	-0.1215	1	471	702	1172
NONMMUT028307.2	NONMMUG017517.2	445	NM_022311	Tcte2	1417	-26.89	-0.1030	1	294	1124	1417
NONMMUT044248.2	NONMMUG027311.2	388	NM_033596	H4c14	384	-47.46	-0.1798	114	388	1	275
NONMMUT050856.2	NONMMUG031526.2	698	NM_001163721	Smim1	3442	-68.36	-0.1050	1	698	10	707
NONMMUT054013.2	NONMMUG033487.2	639	NM_009327	Hnf1a	3186	-60.6	-0.1024	1	639	1507	2145
NONMMUT056817.2	NONMMUG035263.2	299	NM_173429	Zfp775	4083	-36.68	-0.1248	1	299	716	1014
NONMMUT065992.2	NONMMUG040832.2	414	NM_011984	Homer3	2436	-41.25	-0.1039	1	414	1169	1582
NONMMUT067593.2	NONMMUG041876.2	227	NM_001310661	Vps9d1	2829	-29.45	-0.1416	1	227	1008	1234
NONMMUT070902.2	NONMMUG043911.2	230	NM_023805	Slc38a3	2610	-27.86	-0.1244	1	230	31	260
NONMMUT071833.2	NONMMUG044508.2	255	NM_001242952	H2al1g	2036	-23.62	-0.1074	1	255	1581	1835
NONMMUT101088.1	NONMMUG018436.2	1742	NM_011195	Ptcra	1283	-82.69	-0.1041	845	1742	1	898
NONMMUT113599.1	NONMMUG071204.1	226	NM_007910	Efna4	1596	-22.47	-0.1021	1	226	498	723
NONMMUT145776.1	NONMMUG091783.1	361	NM_028623	Cst6	3951	-45.12	-0.1253	1	361	98	458
NONMMUT149202.1	NONMMUG074954.2	423	NM_033561	Eif4h	2494	-50.7	-0.1240	1	423	1526	1948
NONMMUT150971.1	NONMMUG094891.1	966	NM_175022	Prr12	7338	-95.15	-0.1011	1	966	4194	5159
NONMMUT151161.1	NONMMUG094971.1	478	NM_001040085	Sytl2	4731	-60.37	-0.1357	1	476	4256	4731
NONMMUT153193.1	NONMMUG042571.3	377	NM_178644	Oaf	2388	-38.45	-0.1128	1	346	2043	2388
NONMMUT006300.2	NONMMUG004054.2	1222	NM_010670	Krtap12-1	671	-42.69	-0.1046	1	417	255	671
NONMMUT014897.2	NONMMUG009442.2	417	NM_001033149	Ttc9	4778	-28.67	-0.1050	1	307	4472	4778
NONMMUT029339.2	NONMMUG018142.2	403	NM_145830	Ehmt2	4049	-40.82	-0.1052	1	403	3580	3982
NONMMUT043669.2	NONMMUG026993.2	292	NM_001177773	Fbxw7	4164	-30.24	-0.1680	1	197	3968	4164
NONMMUT046954.2	NONMMUG029023.2	551	NM_001253354	Fam214b	3070	-54.22	-0.1063	1	551	222	772
NONMMUT046956.2	NONMMUG029023.2	362	NM_009503	Vcp	3315	-35.75	-0.1067	1	362	2954	3315
NONMMUT049192.2	NONMMUG030447.2	1011	NM_011732	Ybx1	2191	-104.88	-0.1039	1	1011	77	1087
NONMMUT056816.2	NONMMUG035263.2	446	NM_001355746	Zfp467	3522	-59.34	-0.1506	1	446	1319	1764
NONMMUT061010.2	NONMMUG037901.2	662	NM_025880	2410002F23Rik	1982	-68.35	-0.1050	1	662	827	1488
NONMMUT061260.2	NONMMUG038044.2	615	NM_001163565	Ptpn5	3024	-64.17	-0.1086	17	615	1	599
NONMMUT067031.2	NONMMUG041499.3	666	NM_001364186	Chtf8	3299	-70.3	-0.1087	1	665	2635	3299
NONMMUT085172.1	NONMMUG053054.2	207	NM_001110150	Mgat1	2683	-24.37	-0.1256	1	207	1321	1527
NONMMUT094587.1	NONMMUG013356.2	257	NM_010071	Dok2	1717	-26.8	-0.1076	1	257	203	459
NONMMUT115798.1	NONMMUG072602.1	615	NM_199307	Ece1	4816	-102.55	-0.1678	1	615	198	812
NONMMUT124662.1	NONMMUG037091.2	207	NM_024168	Tsen34	1365	-19.81	-0.1065	1	207	751	957
NONMMUT129714.1	NONMMUG081497.1	440	NM_009606	Acta1	1481	-44.61	-0.1016	1	440	454	893
NONMMUT139417.1	NONMMUG088078.1	253	NM_001358562	Ccdc162	7094	-32.8	-0.1414	1	253	4121	4373
NONMMUT154065.1	NONMMUG096395.1	626	NM_001276485	Dag1	5378	-60.38	-0.1005	1	626	1248	1873
NONMMUT011351.2	NONMMUG007169.2	214	NM_001199293	Tex14	4782	-18.51	-0.1076	1	214	960	1173
NONMMUT027049.2	NONMMUG016772.2	216	NM_001356488	Cldnd1	2209	-20.05	-0.1013	1	216	1319	1534
NONMMUT028120.2	NONMMUG017416.2	479	NM_001364953	Rnaset2a	860	-45.44	-0.1108	54	479	1	426
NONMMUT029021.2	NONMMUG017934.2	266	NM_021419	Rnf8	2078	-26.92	-0.1160	1	266	1419	1684
NONMMUT029488.2	NONMMUG018225.2	2945	NM_001010833	Mdc1	7352	-143.73	-0.1371	1845	2945	1	1101
NONMMUT043582.2	NONMMUG026940.2	447	NM_001357746	Pdgfc	3580	-45.68	-0.1255	1	375	3206	3580
NONMMUT043950.2	NONMMUG027118.2	227	NM_008227	Hcn3	3262	-29.77	-0.1404	1	227	1160	1386
NONMMUT046952.2	NONMMUG029023.2	413	NM_001374169	Dnajb5	3212	-38.92	-0.1209	64	413	1	350
NONMMUT050859.2	NONMMUG031526.2	335	NM_001126330	Trp73	4756	-39.66	-0.1255	1	335	1068	1402
NONMMUT056817.2	NONMMUG035263.2	299	NM_001085416	Zfp467	3169	-36.02	-0.1259	1	299	1657	1955
NONMMUT063765.2	NONMMUG039382.2	281	NM_172749	Zfp646	6310	-34.54	-0.1355	1	281	5117	5397
NONMMUT070902.2	NONMMUG043911.2	230	NM_001331161	Hyal1	2672	-28.18	-0.1264	1	230	1282	1511
NONMMUT078858.1	NONMMUG049065.1	255	NM_026680	Golt1a	1842	-26.25	-0.1063	1	255	1328	1582
NONMMUT096052.1	NONMMUG014791.2	2278	NM_001252055	Ly6c1	864	-175.78	-0.2056	654	1517	1	864
NONMMUT105060.1	NONMMUG065699.1	663	NM_028545	Aldh3b3	1999	-82.69	-0.3063	1	302	1698	1999
NONMMUT105807.1	NONMMUG066133.2	239	NM_134155	Brms1	1374	-22.05	-0.1131	1	239	764	1002
NONMMUT113648.1	NONMMUG027267.3	360	NM_001163641	Setdb1	4660	-39.64	-0.1190	1	360	1452	1811
NONMMUT121351.1	NONMMUG076104.1	231	NM_145070	Hip1r	4392	-23.58	-0.1112	1	231	2217	2447
NONMMUT121645.1	NONMMUG034325.3	324	NM_001359057	Gpr12	2464	-36.35	-0.1208	1	324	212	535
NONMMUT132621.1	NONMMUG083496.2	395	NM_178087	Pml	5377	-41.77	-0.1138	1	395	276	670
NONMMUT133957.1	NONMMUG084415.1	388	NM_001324510	Tmed1	1366	-40.84	-0.1069	1	388	466	853
NONMMUT141976.1	NONMMUG089467.1	666	NM_012006	Acot1	1558	-86.33	-0.1314	1	666	765	1430
NONMMUT148734.1	NONMMUG073684.2	2694	NM_001080387	Srsf10	2737	-50.82	-0.1014	1	526	2212	2737
NONMMUT148915.1	NONMMUG093642.1	760	NM_008014	Ppm1g	2165	-53.43	-0.1037	227	760	1	534
NONMMUT149202.1	NONMMUG074954.2	423	NM_001081464	Gtf2ird1	3519	-49.99	-0.1501	65	423	1	359
NONMMUT149803.1	NONMMUG034325.3	396	NM_011669	Usp12	4274	-36.82	-0.1136	1	384	3891	4274
NONMMUT150866.1	NONMMUG037574.3	471	NM_011756	Zfp36	1765	-53.71	-0.1178	1	471	423	893
NONMMUT150983.1	NONMMUG038000.3	522	NM_028544	Rasip1	3152	-54.54	-0.1069	1	522	2534	3055
NONMMUT151929.1	NONMMUG095401.1	300	NM_028069	Cdhr5	2143	-34.91	-0.1168	1	300	1633	1932
NONMMUT011357.2	NONMMUG007173.2	214	NM_001368775	Sept4	3144	-19.5	-0.1455	1	214	2243	2456
NONMMUT029339.2	NONMMUG018142.2	403	NM_009780	C4b	5393	-40.41	-0.1031	1	403	3835	4237
NONMMUT035245.2	NONMMUG021718.2	290	NM_181415	Atrnl1	6583	-32.69	-0.1224	1	290	6263	6552
NONMMUT036899.2	NONMMUG022712.2	364	NM_001083125	Lhx6	3378	-37.35	-0.1112	1	364	54	417
NONMMUT044248.2	NONMMUG027311.2	388	NM_175666	H2bc18	493	-34.88	-0.1114	70	388	1	319
NONMMUT046956.2	NONMMUG029023.2	362	NM_001253354	Fam214b	3070	-44.67	-0.1333	1	362	1054	1415
NONMMUT049849.2	NONMMUG030867.2	332	NM_001081651	Rab42	735	-21.13	-0.1101	123	332	1	210
NONMMUT050856.2	NONMMUG031526.2	698	NM_011642	Trp73	4710	-65.12	-0.1040	1	698	116	813
NONMMUT056816.2	NONMMUG035263.2	446	NM_001079905	Repin1	2957	-44.15	-0.1216	1	399	2559	2957
NONMMUT060450.2	NONMMUG037574.3	234	NM_025616	Timm50	1179	-28.07	-0.1651	1	211	969	1179
NONMMUT066776.2	NONMMUG041330.2	356	NM_001363456	Fam192a	1661	-33.97	-0.1222	1	356	694	1049
NONMMUT067593.2	NONMMUG041876.2	227	NM_007876	Dpep1	2244	-27.3	-0.1500	1	227	493	719
NONMMUT077602.1	NONMMUG000404.2	295	NM_001289766	Zap70	2255	-32.58	-0.1112	1	295	1360	1654
NONMMUT100797.1	NONMMUG017693.2	694	NM_001289484	Zscan10	2504	-84.77	-0.1238	1	694	1706	2399
NONMMUT101088.1	NONMMUG018436.2	1742	NM_025433	Rpl7l1	2606	-143.82	-0.1063	1	1361	1246	2606
NONMMUT105806.1	NONMMUG020632.2	503	NM_009920	Cnih2	1343	-35.75	-0.1114	160	503	1	344
NONMMUT113599.1	NONMMUG071204.1	226	NM_016904	Cks1b	757	-20.89	-0.1187	1	226	152	377
NONMMUT119392.1	NONMMUG074888.1	271	NM_001310727	Kmt5a	2746	-23.9	-0.1008	1	271	931	1201
NONMMUT122332.1	NONMMUG076722.1	252	NM_001288619	Crhr2	2607	-27.89	-0.1148	1	252	2339	2590
NONMMUT124662.1	NONMMUG037091.2	207	NM_001159714	Prpf31	3124	-18.55	-0.1008	1	207	608	814
NONMMUT146014.1	NONMMUG066133.2	630	NM_009920	Cnih2	1343	-49.21	-0.1131	193	630	1	438
NONMMUT151161.1	NONMMUG094971.1	478	NM_001252521	Picalm	4169	-66.45	-0.1438	1	478	147	624
NONMMUT010862.2	NONMMUG006854.2	282	NM_001040403	Flot2	2621	-24.84	-0.1150	1	255	2367	2621
NONMMUT036575.2	NONMMUG022514.2	556	NM_175392	Miga2	3547	-54.46	-0.1028	1	556	922	1477
NONMMUT036900.2	NONMMUG022712.2	227	NM_001355125	Lhx6	3346	-44.96	-0.2366	1	227	98	324
NONMMUT040682.2	NONMMUG025222.2	716	NM_019811	Acss2	2833	-45.7	-0.1034	1	454	2380	2833
NONMMUT043950.2	NONMMUG027118.2	227	NM_001161824	Mtx1	1091	-22.93	-0.1152	1	227	515	741
NONMMUT046956.2	NONMMUG029023.2	362	NM_172691	Fam214b	3074	-44.67	-0.1333	1	362	1058	1419
NONMMUT053799.2	NONMMUG033378.2	347	NM_001301644	Pitpnb	2796	-33.94	-0.1025	1	347	95	441
NONMMUT061197.2	NONMMUG038000.3	374	NM_008051	Fut1	2580	-38.15	-0.1060	1	374	1480	1853
NONMMUT061260.2	NONMMUG038044.2	615	NM_175318	Spty2d1	5226	-45.09	-0.1081	184	615	1	432
NONMMUT063765.2	NONMMUG039382.2	281	NM_001360699	Kat8	1559	-28.66	-0.1184	1	281	1134	1414
NONMMUT064983.2	NONMMUG040136.2	252	NM_001079908	Fgfr1	5019	-26.56	-0.1116	1	252	4661	4912
NONMMUT066778.2	NONMMUG041330.2	337	NM_026274	Rspry1	3849	-32.67	-0.1317	1	337	3323	3659
NONMMUT068287.2	NONMMUG042239.2	290	NM_001110306	Keap1	3319	-35.14	-0.1306	1	290	26	315
NONMMUT085172.1	NONMMUG053054.2	207	NM_001362730	Zfp62	4082	-21.75	-0.1310	1	207	3470	3676
NONMMUT102615.1	NONMMUG064169.1	287	NM_177606	Plekhh2	6886	-25.44	-0.1030	1	287	2829	3115
NONMMUT105807.1	NONMMUG066133.2	239	NM_001369361	Klc2	2995	-27.58	-0.1204	1	239	2684	2922
NONMMUT121644.1	NONMMUG034325.3	326	NM_001243111	Gm3402	2308	-32.38	-0.1035	1	326	556	881
NONMMUT141973.1	NONMMUG089467.1	493	NM_134188	Acot2	2198	-56.44	-0.1201	1	493	1576	2068
NONMMUT144127.1	NONMMUG090769.1	1576	NM_001163634	Wnt7b	3494	-143.56	-0.1057	214	1576	1	1363
NONMMUT150983.1	NONMMUG038000.3	522	NM_001289693	Ntn5	1761	-53.64	-0.1060	1	522	1053	1574
NONMMUT151929.1	NONMMUG095401.1	300	NM_001282076	Deaf1	2316	-38.04	-0.1409	1	300	110	409
NONMMUT152738.1	NONMMUG095800.1	320	NM_001357308	Pbx4	1114	-30.23	-0.1229	71	320	1	250
NONMMUT024063.2	NONMMUG014868.2	454	NM_054099	1110038F14Rik	1622	-34.71	-0.1012	85	454	1	370
NONMMUT043950.2	NONMMUG027118.2	227	NM_001099779	Pklr	2661	-20.3	-0.1277	1	227	2011	2237
NONMMUT046956.2	NONMMUG029023.2	362	NM_053081	Fancg	2723	-34.21	-0.1040	1	362	1227	1588
NONMMUT050857.2	NONMMUG031526.2	400	NM_201226	Lrrc47	3395	-49.08	-0.1323	1	392	3004	3395
NONMMUT053799.2	NONMMUG033378.2	347	NM_001301643	Pitpnb	2742	-33.94	-0.1025	1	347	95	441
NONMMUT061197.2	NONMMUG038000.3	374	NM_001358870	Ntn5	2157	-38.48	-0.1093	1	374	890	1263
NONMMUT063765.2	NONMMUG039382.2	281	NM_001319147	Prss36	3028	-32.04	-0.1247	1	281	2047	2327
NONMMUT064983.2	NONMMUG040136.2	252	NM_001001735	Nsd3	3652	-26.61	-0.1113	1	252	166	417
NONMMUT068287.2	NONMMUG042239.2	290	NM_001110305	Keap1	3434	-35.14	-0.1306	1	290	26	315
NONMMUT085172.1	NONMMUG053054.2	207	NM_001362729	Zfp62	4231	-21.75	-0.1310	1	207	3470	3676
NONMMUT102615.1	NONMMUG064169.1	287	NM_001357987	Plekhh2	5973	-25.44	-0.1030	1	287	2825	3111
NONMMUT105062.1	NONMMUG020600.2	427	NM_026720	Ankrd13d	2141	-45.06	-0.1070	1	427	483	909
NONMMUT105807.1	NONMMUG066133.2	239	NM_001369360	Klc2	2944	-27.58	-0.1204	1	239	2633	2871
NONMMUT114919.1	NONMMUG029164.2	282	NM_029077	Trim14	3204	-26.55	-0.1066	1	282	1958	2239
NONMMUT124662.1	NONMMUG037091.2	207	NM_029934	Mboat7	2341	-23.4	-0.1272	1	207	1037	1243
NONMMUT141973.1	NONMMUG089467.1	493	NM_023633	Riox1	2346	-67.92	-0.1473	1	493	1797	2289
NONMMUT150983.1	NONMMUG038000.3	522	NM_001289692	Ntn5	2027	-53.19	-0.1037	1	522	334	855
NONMMUT151929.1	NONMMUG095401.1	300	NM_001282073	Deaf1	2026	-29.22	-0.1051	1	300	1002	1301
NONMMUT152738.1	NONMMUG095800.1	320	NM_001353930	Yjefn3	793	-47.17	-0.1572	1	320	442	761
NONMMUT154150.1	NONMMUG096432.1	2578	NM_001164823	Tmem42	466	-64.01	-0.1475	2115	2578	1	464
NONMMUT008502.2	NONMMUG005256.3	1198	NM_001362713	Tbrg4	3265	-118.36	-0.1017	1	1198	4	1201
NONMMUT011353.2	NONMMUG007170.2	214	NM_053269	Rad51c	3926	-17.98	-0.1064	1	214	1623	1836
NONMMUT013224.2	NONMMUG008390.3	301	NM_016676	Rab10	3513	-21.08	-0.1205	48	301	1	254
NONMMUT021419.2	NONMMUG013297.2	215	NM_033325	Loxl2	5180	-30.94	-0.1480	1	215	988	1202
NONMMUT024485.2	NONMMUG015144.3	511	NM_001163633	Wnt7b	3410	-52.13	-0.1060	1	511	60	570
NONMMUT043950.2	NONMMUG027118.2	227	NM_013691	Thbs3	3194	-23.53	-0.1258	1	227	1853	2079
NONMMUT044189.2	NONMMUG027266.2	414	NM_199475	Mindy1	2834	-33.23	-0.1235	1	282	2553	2834
NONMMUT046950.2	NONMMUG029023.2	487	NM_001374167	Dnajb5	3334	-42.49	-0.1029	1	432	2903	3334
NONMMUT049611.2	NONMMUG030721.2	459	NM_025970	Zbtb8os	3557	-97.26	-0.2176	1	459	1120	1578
NONMMUT050859.2	NONMMUG031526.2	335	NM_175287	A430005L14Rik	1097	-33.93	-0.1203	1	335	393	727
NONMMUT053224.2	NONMMUG033062.2	684	NM_010203	Fgf5	2504	-77.78	-0.1151	1	684	1820	2503
NONMMUT056817.2	NONMMUG035263.2	299	NM_001355746	Zfp467	3522	-36.02	-0.1259	1	299	1657	1955
NONMMUT070902.2	NONMMUG043911.2	230	NM_009153	Sema3b	3556	-24.5	-0.1150	1	230	2078	2307
NONMMUT077842.1	NONMMUG000674.2	220	NM_028546	1700066M21Rik	3007	-22.1	-0.1116	1	220	130	349
NONMMUT096052.1	NONMMUG014791.2	2278	NM_001271446	Ly6a	982	-166.12	-0.1704	534	1515	1	982
NONMMUT099176.1	NONMMUG062052.1	241	NM_009384	Tiam1	7290	-24.68	-0.1148	1	241	3329	3569
NONMMUT113648.1	NONMMUG027267.3	360	NM_029885	Gabpb2	8687	-34.88	-0.1087	1	360	8271	8630
NONMMUT127727.1	NONMMUG080175.1	648	NM_001316672	Prkcb	2740	-67.83	-0.1089	1	648	1054	1701
NONMMUT131176.1	NONMMUG040860.2	1339	NM_001363407	Kcnn1	3270	-80.8	-0.1016	446	1339	1	894
NONMMUT133957.1	NONMMUG084415.1	388	NM_021888	Qtrt1	1321	-43.55	-0.1177	1	388	843	1230
NONMMUT141011.1	NONMMUG088976.1	202	NM_011751	Zfp207	2257	-23.32	-0.1234	1	202	749	950
NONMMUT146014.1	NONMMUG066133.2	630	NM_001001885	Tmem151a	3945	-57.98	-0.1047	68	630	1	563
NONMMUT149202.1	NONMMUG074954.2	423	NM_001305875	Limk1	3110	-46.33	-0.1127	1	423	445	867
NONMMUT150866.1	NONMMUG037574.3	471	NM_138752	Plekhg2	5052	-48.71	-0.1154	1	471	53	523
NONMMUT151956.1	NONMMUG095418.1	254	NM_153419	Grwd1	1902	-28.92	-0.1220	1	254	477	730
NONMMUT011351.2	NONMMUG007169.2	214	NM_053269	Rad51c	3926	-17.98	-0.1064	1	214	1623	1836
NONMMUT028120.2	NONMMUG017416.2	479	NM_026611	Rnaset2b	2026	-56.07	-0.2279	1	263	1764	2026
NONMMUT029021.2	NONMMUG017934.2	266	NM_198647	Tbc1d22b	3491	-23.95	-0.1015	1	266	1744	2009
NONMMUT029559.2	NONMMUG018271.2	513	NM_177634	H2-M10.4	1405	-153.84	-0.3034	1	513	496	1008
NONMMUT033664.2	NONMMUG020692.2	453	NM_007600	Capn1	3101	-43.5	-0.1107	1	453	2501	2953
NONMMUT036901.2	NONMMUG022712.2	309	NM_008500	Lhx6	3482	-35.52	-0.1204	1	309	94	402
NONMMUT043950.2	NONMMUG027118.2	227	NM_010108	Efna3	1225	-24.98	-0.1255	1	227	998	1224
NONMMUT044189.2	NONMMUG027266.2	414	NM_133858	Mindy1	2807	-33.23	-0.1235	1	282	2526	2807
NONMMUT044242.2	NONMMUG027309.2	3467	NM_175662	H2ac20	468	-32.26	-0.1101	3137	3467	1	331
NONMMUT046952.2	NONMMUG029023.2	413	NM_021468	Unc13b	6408	-43.22	-0.1294	62	413	1	352
NONMMUT050859.2	NONMMUG031526.2	335	NM_001163721	Smim1	3442	-39.53	-0.1216	1	335	579	913
NONMMUT056817.2	NONMMUG035263.2	299	NM_001347152	Krba1	6992	-41.91	-0.1426	1	299	993	1291
NONMMUT063765.2	NONMMUG039382.2	281	NM_198424	Orai3	1996	-84.14	-0.3105	1	281	193	473
NONMMUT065528.2	NONMMUG040528.2	249	NM_023503	Ing2	2813	-26.26	-0.1762	1	249	217	465
NONMMUT070902.2	NONMMUG043911.2	230	NM_001357291	Cyb561d2	1572	-21.66	-0.1078	1	230	190	419
NONMMUT077842.1	NONMMUG000674.2	220	NM_001037742	Tyw5	1413	-24.31	-0.1152	1	220	60	279
NONMMUT078858.1	NONMMUG049065.1	255	NM_175443	Etnk2	2280	-25.89	-0.1040	1	255	436	690
NONMMUT096052.1	NONMMUG014791.2	2278	NM_001252058	Ly6c1	707	-115.25	-0.1835	344	1050	1	707
NONMMUT096525.1	NONMMUG060329.1	1415	NM_001289603	Tfcp2	3295	-62.97	-0.2217	1	301	2995	3295
NONMMUT100983.1	NONMMUG018225.2	2945	NM_001010833	Mdc1	7352	-143.73	-0.1371	1844	2945	1	1102
NONMMUT105807.1	NONMMUG066133.2	239	NM_153553	Npas4	3278	-25.7	-0.1318	1	239	19	257
NONMMUT121645.1	NONMMUG034325.3	324	NM_011669	Usp12	4274	-40.55	-0.1330	1	324	3941	4264
NONMMUT127726.1	NONMMUG080175.1	675	NM_001316689	Ern2	2985	-94.61	-0.1418	1	675	1424	2098
NONMMUT129339.1	NONMMUG081206.1	1049	NM_025391	Nip7	3033	-104.76	-0.1035	1	1049	346	1394
NONMMUT133957.1	NONMMUG084415.1	388	NM_001357721	Dnm2	3056	-50.56	-0.1474	19	388	1	370
NONMMUT141011.1	NONMMUG088976.1	202	NM_001130169	Zfp207	2362	-23.32	-0.1234	1	202	749	950
NONMMUT141976.1	NONMMUG089467.1	666	NM_134247	Acot4	2325	-94.54	-0.1513	1	666	48	713
NONMMUT148734.1	NONMMUG073684.2	2694	NM_001284196	Srsf10	3418	-50.82	-0.1014	1	526	2893	3418
NONMMUT149202.1	NONMMUG074954.2	423	NM_001081467	Gtf2ird1	4382	-49.99	-0.1501	65	423	1	359
NONMMUT151162.1	NONMMUG094971.1	604	NM_146194	Picalm	4193	-60.16	-0.1361	1	489	3705	4193
NONMMUT151929.1	NONMMUG095401.1	300	NM_178381	Ano9	3012	-32.68	-0.1224	1	300	1737	2036
NONMMUT151956.1	NONMMUG095418.1	254	NM_011181	Cyth2	2527	-28.27	-0.1173	1	254	2248	2501
NONMMUT004501.2	NONMMUG002899.2	256	NM_001355061	Cr1l	1696	-25.46	-0.1074	1	256	1220	1475
NONMMUT028556.2	NONMMUG017675.2	16469	NM_001362121	Gm9805	2341	-436.83	-0.1885	3216	5556	1	2341
NONMMUT046954.2	NONMMUG029023.2	551	NM_001253353	Fam214b	3293	-54.22	-0.1063	1	551	445	995
NONMMUT056816.2	NONMMUG035263.2	446	NM_001347168	Rarres2	696	-36.69	-0.1095	111	446	1	336
NONMMUT061197.2	NONMMUG038000.3	374	NM_001271993	Fut2	3059	-34.61	-0.1018	1	374	829	1202
NONMMUT067593.2	NONMMUG041876.2	227	NM_194446	Cdk10	1649	-22.1	-0.1100	1	204	1446	1649
NONMMUT085172.1	NONMMUG053054.2	207	NM_001110149	Mgat1	2509	-24.37	-0.1256	1	207	1321	1527
NONMMUT094587.1	NONMMUG013356.2	257	NM_008115	Gfra2	3487	-26.52	-0.1133	1	257	2339	2595
NONMMUT097706.1	NONMMUG061066.1	961	NM_001304965	Pou6f1	4953	-95.17	-0.1044	1	961	3971	4931
NONMMUT124905.1	NONMMUG037680.2	528	NM_009845	Cd22	3972	-69.93	-0.1593	1	528	2530	3057
NONMMUT134324.1	NONMMUG084661.1	381	NM_023483	1110032A03Rik	3268	-53.84	-0.1538	1	381	1262	1642
NONMMUT139417.1	NONMMUG088078.1	253	NM_001243075	Cep57l1	2011	-27.6	-0.1243	1	253	318	570
NONMMUT146159.1	NONMMUG092007.1	318	NM_001360348	Mxi1	2570	-28.03	-0.1126	1	318	2035	2352
NONMMUT151161.1	NONMMUG094971.1	478	NM_001368878	Sytl2	8033	-61.04	-0.1650	1	402	7632	8033
NONMMUT151929.1	NONMMUG095401.1	300	NM_001172065	Lrrc56	2417	-31.18	-0.1061	1	300	1200	1499
NONMMUT154065.1	NONMMUG096395.1	626	NM_001276482	Dag1	5447	-60.38	-0.1005	1	626	1317	1942
NONMMUT011353.2	NONMMUG007170.2	214	NM_001291440	Rad51c	4083	-17.98	-0.1064	1	214	1780	1993
NONMMUT021419.2	NONMMUG013297.2	215	NM_001360352	Entpd4	6120	-28.19	-0.1342	1	215	5887	6101
NONMMUT023387.2	NONMMUG014468.2	580	NM_001032727	Sybu	2923	-70.46	-0.1232	1	580	214	793
NONMMUT043028.2	NONMMUG026570.2	297	NM_019739	Foxo1	5552	-33.25	-0.1192	1	297	93	389
NONMMUT044242.2	NONMMUG027309.2	3467	NM_178213	H2ac21	469	-39.3	-0.1248	3147	3467	1	321
NONMMUT046950.2	NONMMUG029023.2	487	NM_001355439	Dnajb5	3235	-37.65	-0.1076	136	487	1	352
NONMMUT046952.2	NONMMUG029023.2	413	NM_053081	Fancg	2723	-40.49	-0.1002	1	413	941	1353
NONMMUT049611.2	NONMMUG030721.2	459	NM_009030	Rbbp4	4407	-60.81	-0.1575	1	406	4002	4407
NONMMUT050192.2	NONMMUG031077.2	333	NM_001369178	Ece1	4725	-29.85	-0.1066	1	333	4348	4680
NONMMUT050859.2	NONMMUG031526.2	335	NM_007859	Dffb	2048	-35.9	-0.1154	1	335	709	1043
NONMMUT070902.2	NONMMUG043911.2	230	NM_008138	Gnai2	2190	-26.19	-0.1169	1	230	1857	2086
NONMMUT077842.1	NONMMUG000674.2	220	NM_001302963	Tyw5	1379	-24.31	-0.1152	1	220	60	279
NONMMUT096052.1	NONMMUG014791.2	2278	NM_001271418	Ly6a	966	-156.91	-0.1655	550	1515	1	966
NONMMUT099176.1	NONMMUG062052.1	241	NM_001145886	Tiam1	7255	-24.68	-0.1148	1	241	3294	3534
NONMMUT101928.1	NONMMUG017828.2	306	NM_001005916	Zbtb9	2784	-30.05	-0.2146	1	222	2563	2784
NONMMUT106295.1	NONMMUG066424.1	653	NM_001177812	Wbp1l	3926	-70.17	-0.1102	1	653	913	1565
NONMMUT113648.1	NONMMUG027267.3	360	NM_023628	Anxa9	1853	-32.36	-0.1054	1	360	1077	1436
NONMMUT114872.1	NONMMUG029020.2	1274	NM_009503	Vcp	3315	-53.32	-0.1144	1	470	2846	3315
NONMMUT117031.1	NONMMUG029933.2	268	NM_175029	Atg4c	3178	-28.25	-0.1177	1	268	75	342
NONMMUT117428.1	NONMMUG073653.1	1769	NM_001362961	Dhdds	3336	-89.2	-0.1172	1003	1769	1	767
NONMMUT127726.1	NONMMUG080175.1	675	NM_012016	Ern2	2988	-91.33	-0.1382	1	675	1664	2338
NONMMUT133957.1	NONMMUG084415.1	388	NM_010561	Ilf3	3591	-40.85	-0.1285	1	333	3259	3591
NONMMUT141011.1	NONMMUG088976.1	202	NM_001362721	Zfp207	2221	-23.32	-0.1234	1	202	749	950
NONMMUT149202.1	NONMMUG074954.2	423	NM_001081470	Gtf2ird1	3210	-49.99	-0.1501	65	423	1	359
NONMMUT151956.1	NONMMUG095418.1	254	NM_144801	Tmem143	2169	-27.76	-0.1228	1	254	1130	1383
NONMMUT011353.2	NONMMUG007170.2	214	NM_001199293	Tex14	4782	-18.51	-0.1076	1	214	960	1173
NONMMUT012003.2	NONMMUG007584.2	400	NM_134037	Acly	4397	-36.41	-0.1026	1	400	33	432
NONMMUT021419.2	NONMMUG013297.2	215	NM_001359160	Entpd4b	6016	-28.19	-0.1342	1	215	5783	5997
NONMMUT027049.2	NONMMUG016772.2	216	NM_171826	Cldnd1	2194	-20.05	-0.1013	1	216	1319	1534
NONMMUT043028.2	NONMMUG026570.2	297	NM_001004176	Maml3	6512	-30.52	-0.1049	1	297	2900	3196
NONMMUT043950.2	NONMMUG027118.2	227	NM_013604	Mtx1	1094	-22.93	-0.1152	1	227	518	744
NONMMUT046950.2	NONMMUG029023.2	487	NM_001355438	Dnajb5	3561	-42.5	-0.1211	136	487	1	352
NONMMUT050192.2	NONMMUG031077.2	333	NM_001369177	Ece1	4656	-32.58	-0.1131	1	309	4348	4656
NONMMUT050859.2	NONMMUG031526.2	335	NM_001357248	Smim1	3438	-39.53	-0.1216	1	335	575	909
NONMMUT056817.2	NONMMUG035263.2	299	NM_001347164	Atp6v0e2	1707	-28.87	-0.1050	1	299	116	414
NONMMUT070902.2	NONMMUG043911.2	230	NM_001370877	Lsmem2	981	-20.16	-0.1029	1	230	283	512
NONMMUT077842.1	NONMMUG000674.2	220	NM_001302962	Tyw5	1419	-24.31	-0.1152	1	220	60	279
NONMMUT078858.1	NONMMUG049065.1	255	NM_182930	Plekha6	7397	-26.57	-0.1071	1	255	5212	5466
NONMMUT096052.1	NONMMUG014791.2	2278	NM_001271417	Ly6a	987	-160.95	-0.1639	529	1515	1	987
NONMMUT097688.1	NONMMUG015457.2	741	NM_028015	Cers5	2010	-49.72	-0.1393	351	741	1	391
NONMMUT112405.1	NONMMUG028223.2	300	NM_001081298	Adgrl2	6052	-25.58	-0.1070	1	300	2088	2387
NONMMUT113599.1	NONMMUG071204.1	226	NM_001113331	Shc1	3554	-29.64	-0.1460	1	226	462	687
NONMMUT120840.1	NONMMUG033062.2	2248	NM_029947	Prdm8	3119	-203.54	-0.1240	595	2248	1	1654
NONMMUT127726.1	NONMMUG080175.1	675	NM_011121	Plk1	2214	-88.82	-0.1348	1	675	232	906
NONMMUT133957.1	NONMMUG084415.1	388	NM_007871	Dnm2	3533	-50.56	-0.1474	19	388	1	370
NONMMUT141011.1	NONMMUG088976.1	202	NM_001130171	Zfp207	2269	-23.32	-0.1234	1	202	749	950
NONMMUT144192.1	NONMMUG090806.1	2945	NM_001024702	C1ql4	717	-83.65	-0.1252	1561	2277	1	717
NONMMUT147424.1	NONMMUG092729.1	626	NM_001293801	Arfip1	2890	-32.53	-0.1694	1	200	2691	2890
NONMMUT149202.1	NONMMUG074954.2	423	NM_001081469	Gtf2ird1	3291	-49.99	-0.1501	65	423	1	359
NONMMUT151956.1	NONMMUG095418.1	254	NM_133950	Kdelr1	1525	-23.56	-0.1003	1	254	104	357
NONMMUT152801.1	NONMMUG041084.3	2087	NM_001007571	D8Ertd738e	661	-62.32	-0.1022	1466	2087	1	622
NONMMUT010451.2	NONMMUG006564.2	2992	NM_026982	Tmem256	431	-61.14	-0.1425	67	497	1	431
NONMMUT011351.2	NONMMUG007169.2	214	NM_031386	Tex14	4763	-18.51	-0.1076	1	214	941	1154
NONMMUT024003.2	NONMMUG014826.2	863	NM_021555	Hgh1	1967	-87.49	-0.1027	1	863	1035	1897
NONMMUT024064.2	NONMMUG014868.2	260	NM_172817	Zfp647	2213	-25.97	-0.1087	1	260	429	688
NONMMUT029021.2	NONMMUG017934.2	266	NM_028791	Cmtr1	6380	-30.75	-0.1331	1	266	2688	2953
NONMMUT029900.2	NONMMUG018473.2	685	NM_198421	Usp49	8253	-66.64	-0.1016	1	685	748	1432
NONMMUT043950.2	NONMMUG027118.2	227	NM_010107	Efna1	1483	-24.57	-0.1164	1	227	502	728
NONMMUT046952.2	NONMMUG029023.2	413	NM_020035	Pigo	4266	-42.57	-0.1263	1	413	3021	3433
NONMMUT050859.2	NONMMUG031526.2	335	NM_001163019	A430005L14Rik	983	-33.93	-0.1203	1	335	393	727
NONMMUT055276.2	NONMMUG034325.3	620	NM_001359055	Gpr12	2481	-55.12	-0.1085	1	514	1968	2481
NONMMUT056817.2	NONMMUG035263.2	299	NM_001110160	Lrrc61	2681	-35.84	-0.1207	1	299	2174	2472
NONMMUT063765.2	NONMMUG039382.2	281	NM_178600	Vkorc1	748	-27.05	-0.1009	1	281	338	618
NONMMUT070902.2	NONMMUG043911.2	230	NM_001357290	Cyb561d2	1755	-21.66	-0.1078	1	230	373	602
NONMMUT078491.1	NONMMUG001576.3	496	NM_008381	Inhbb	4257	-60.92	-0.1464	1	496	728	1223
NONMMUT078858.1	NONMMUG049065.1	255	NM_031193	Ren2	1525	-23.81	-0.1273	1	255	691	945
NONMMUT096052.1	NONMMUG014791.2	2278	NM_001252057	Ly6c1	621	-112.97	-0.2172	430	1050	1	621
NONMMUT105807.1	NONMMUG066133.2	239	NM_153129	Pacs1	4342	-26.01	-0.1136	1	239	266	504
NONMMUT121351.1	NONMMUG076104.1	231	NM_177876	Vps37b	2512	-24.95	-0.1129	1	231	491	721
NONMMUT127726.1	NONMMUG080175.1	675	NM_001316672	Prkcb	2740	-73.01	-0.1088	1	675	1027	1701
NONMMUT133957.1	NONMMUG084415.1	388	NM_001357719	Dnm2	3056	-50.56	-0.1474	19	388	1	370
NONMMUT141976.1	NONMMUG089467.1	666	NM_134188	Acot2	2198	-93.15	-0.1517	1	654	1545	2198
NONMMUT148734.1	NONMMUG073684.2	2694	NM_001284195	Srsf10	2734	-50.82	-0.1014	1	526	2209	2734
NONMMUT149202.1	NONMMUG074954.2	423	NM_001081466	Gtf2ird1	3462	-49.99	-0.1501	65	423	1	359
NONMMUT151162.1	NONMMUG094971.1	604	NM_145151	Crebzf	5263	-64.59	-0.1086	1	604	107	710
NONMMUT151929.1	NONMMUG095401.1	300	NM_153777	Lrrc56	2140	-31.18	-0.1061	1	300	1337	1636
NONMMUT151956.1	NONMMUG095418.1	254	NM_010129	Emp3	758	-26.39	-0.1275	1	254	386	639
NONMMUT005037.2	NONMMUG003231.2	468	NM_008813	Enpp1	6778	-32.23	-0.1064	135	468	1	334
NONMMUT010862.2	NONMMUG006854.2	282	NM_001362626	Flot2	2691	-29.06	-0.1158	1	255	2437	2691
NONMMUT012003.2	NONMMUG007584.2	400	NM_001199296	Acly	4427	-36.41	-0.1026	1	400	33	432
NONMMUT041142.2	NONMMUG025497.2	300	NM_001363020	Zmynd8	5411	-31.88	-0.1081	1	300	2531	2830
NONMMUT043950.2	NONMMUG027118.2	227	NM_001310017	Gm45927	2850	-25.62	-0.1154	1	227	2525	2751
NONMMUT046952.2	NONMMUG029023.2	413	NM_001305387	Pigo	3539	-42.57	-0.1263	1	413	2949	3361
NONMMUT050858.2	NONMMUG031526.2	578	NM_001357248	Smim1	3438	-61.74	-0.1211	1	578	476	1053
NONMMUT061197.2	NONMMUG038000.3	374	NM_020013	Fgf21	947	-32.75	-0.1043	1	374	525	898
NONMMUT063765.2	NONMMUG039382.2	281	NM_009739	Bckdk	2857	-84.73	-1.1768	189	281	1	93
NONMMUT068287.2	NONMMUG042239.2	290	NM_018793	Tyk2	4804	-28.33	-0.1001	1	290	111	400
NONMMUT070902.2	NONMMUG043911.2	230	NM_001174050	Cacna2d2	5515	-26.49	-0.1193	1	230	4225	4454
NONMMUT085172.1	NONMMUG053054.2	207	NM_146471	Olfr1393	936	-19.82	-0.1239	1	207	257	463
NONMMUT085736.1	NONMMUG053379.1	236	NM_001372527	Tbkbp1	3369	-28.26	-0.1372	1	236	1335	1570
NONMMUT105807.1	NONMMUG066133.2	239	NM_007854	Slc29a2	2473	-28.38	-0.1203	1	239	1756	1994
NONMMUT124895.1	NONMMUG078289.2	689	NM_029274	Kmt2b	8457	-62.76	-0.1009	15	689	1	675
NONMMUT133957.1	NONMMUG084415.1	388	NM_001042708	Ilf3	3777	-40.85	-0.1285	1	333	3445	3777
NONMMUT141974.1	NONMMUG089467.1	517	NM_134247	Acot4	2325	-53.11	-0.1043	1	517	1560	2076
NONMMUT151162.1	NONMMUG094971.1	604	NM_001289583	Sytl2	4779	-54.75	-0.1772	1	355	4425	4779
NONMMUT151929.1	NONMMUG095401.1	300	NM_008284	Hras	2043	-35.58	-0.1266	1	300	14	313
NONMMUT152738.1	NONMMUG095800.1	320	NM_145596	Gatad2a	5213	-42.57	-0.1468	1	320	7	326
NONMMUT011351.2	NONMMUG007169.2	214	NM_001291440	Rad51c	4083	-17.98	-0.1064	1	214	1780	1993
NONMMUT024064.2	NONMMUG014868.2	260	NM_145916	Zfp7	2777	-28.77	-0.1290	1	260	1923	2182
NONMMUT027049.2	NONMMUG016772.2	216	NM_007757	Cpox	3184	-27.12	-0.1420	1	216	2478	2693
NONMMUT028120.2	NONMMUG017416.2	479	NM_001364954	Rnaset2a	919	-43.4	-0.1080	74	479	1	406
NONMMUT029021.2	NONMMUG017934.2	266	NM_026782	Ccdc167	1370	-26.58	-0.1076	1	266	339	604
NONMMUT043582.2	NONMMUG026940.2	447	NM_019971	Pdgfc	3521	-45.68	-0.1255	1	375	3147	3521
NONMMUT043950.2	NONMMUG027118.2	227	NM_009057	Slc50a1	1022	-19.91	-0.1070	1	227	198	424
NONMMUT046952.2	NONMMUG029023.2	413	NM_009503	Vcp	3315	-40.68	-0.1038	1	413	142	554
NONMMUT050859.2	NONMMUG031526.2	335	NM_001126331	Trp73	4468	-36.92	-0.1112	1	335	4071	4405
NONMMUT056817.2	NONMMUG035263.2	299	NM_001085417	Zfp467	965	-33.83	-0.1163	1	299	126	424
NONMMUT063765.2	NONMMUG039382.2	281	NM_178029	Setd1a	5931	-30.99	-0.1156	1	281	3447	3727
NONMMUT070902.2	NONMMUG043911.2	230	NM_001357289	Cyb561d2	1726	-21.66	-0.1078	1	230	344	573
NONMMUT078858.1	NONMMUG049065.1	255	NM_031192	Ren1	1422	-23.81	-0.1273	1	255	696	950
NONMMUT085736.1	NONMMUG053379.1	236	NM_198100	Tbkbp1	3321	-28.26	-0.1372	1	236	1287	1522
NONMMUT097688.1	NONMMUG015457.2	741	NM_009597	Asic1	4107	-65.86	-0.1034	55	741	1	687
NONMMUT121351.1	NONMMUG076104.1	231	NM_175520	Hcar1	3285	-21.31	-0.1045	1	231	33	263
NONMMUT121645.1	NONMMUG034325.3	324	NM_001359058	Gpr12	2067	-39.18	-0.1244	1	324	212	535
NONMMUT133957.1	NONMMUG084415.1	388	NM_001357718	Dnm2	3545	-50.56	-0.1474	19	388	1	370
NONMMUT141976.1	NONMMUG089467.1	666	NM_023633	Riox1	2346	-142.19	-0.2208	1	666	82	747
NONMMUT147423.1	NONMMUG092729.1	783	NM_001293801	Arfip1	2890	-32.53	-0.1694	1	200	2691	2890
NONMMUT149202.1	NONMMUG074954.2	423	NM_001081465	Gtf2ird1	3462	-47.64	-0.1182	1	423	2405	2827
NONMMUT151162.1	NONMMUG094971.1	604	NM_031394	Sytl2	4659	-54.75	-0.1772	1	355	4305	4659
NONMMUT151956.1	NONMMUG095418.1	254	NM_008172	Grin2d	4383	-37.29	-0.1522	1	254	2928	3181
NONMMUT152851.1	NONMMUG095865.1	551	NM_027022	Cmtm2a	1084	-138.69	-0.2573	1	551	447	997
NONMMUT010862.2	NONMMUG006854.2	282	NM_001284228	Flot2	2782	-29.06	-0.1158	1	255	2528	2782
NONMMUT024064.2	NONMMUG014868.2	260	NM_001007568	Zfp251	3504	-24.37	-0.1093	1	260	166	425
NONMMUT029235.2	NONMMUG018075.2	462	NM_009059	Rgl2	2940	-41.99	-0.1037	1	426	2515	2940
NONMMUT043950.2	NONMMUG027118.2	227	NM_001163432	Clk2	2317	-25.62	-0.1154	1	227	1992	2218
NONMMUT046952.2	NONMMUG029023.2	413	NM_001163233	Fancg	2702	-40.49	-0.1002	1	413	941	1353
NONMMUT049610.2	NONMMUG030721.2	412	NM_001285865	C77080	5077	-36.17	-0.1019	1	412	2236	2647
NONMMUT050858.2	NONMMUG031526.2	578	NM_001126331	Trp73	4468	-70.14	-0.1246	1	578	3684	4261
NONMMUT053799.2	NONMMUG033378.2	347	NM_001359215	Pitpnb	2739	-33.94	-0.1025	1	347	95	441
NONMMUT061197.2	NONMMUG038000.3	374	NM_008749	Nucb1	2627	-41.96	-0.1166	1	374	1148	1521
NONMMUT063765.2	NONMMUG039382.2	281	NM_001362190	Zfp668	8196	-87.24	-0.3196	1	281	5247	5527
NONMMUT068287.2	NONMMUG042239.2	290	NM_001205312	Tyk2	4873	-28.33	-0.1001	1	290	111	400
NONMMUT070902.2	NONMMUG043911.2	230	NM_001042779	Sema3b	3746	-27.1	-0.1369	1	230	110	339
NONMMUT077603.1	NONMMUG000404.2	399	NM_018872	Tmem131	6548	-39.74	-0.1113	38	399	1	362
NONMMUT085172.1	NONMMUG053054.2	207	NM_009562	Zfp62	4135	-21.75	-0.1310	1	207	3470	3676
NONMMUT105062.1	NONMMUG020600.2	427	NM_130863	Grk2	3451	-42.7	-0.1044	1	427	2996	3422
NONMMUT105807.1	NONMMUG066133.2	239	NM_001374047	Brms1	1495	-22.09	-0.1175	1	205	1291	1495
NONMMUT117754.1	NONMMUG031367.2	562	NM_001159344	Casz1	7966	-55.29	-0.1035	1	562	2096	2657
NONMMUT122172.1	NONMMUG035178.3	246	NM_001311111	Tpk1	2524	-21.59	-0.2453	1	99	2426	2524
NONMMUT124662.1	NONMMUG037091.2	207	NM_181820	Tmc4	2346	-18.93	-0.1002	1	207	1437	1643
NONMMUT135348.1	NONMMUG043911.2	569	NM_019742	Tusc2	1661	-34.79	-0.1171	1	337	1325	1661
NONMMUT147722.1	NONMMUG092928.1	1277	NM_026767	Dpm3	497	-47.31	-0.1038	194	690	1	497
NONMMUT148915.1	NONMMUG093642.1	760	NM_001127356	Eif2b4	2101	-57.27	-0.1025	1	600	1502	2101
NONMMUT151162.1	NONMMUG094971.1	604	NM_001252521	Picalm	4169	-60.16	-0.1361	1	489	3681	4169
NONMMUT151929.1	NONMMUG095401.1	300	NM_001309439	Sct	511	-28.84	-0.1023	1	300	12	311
NONMMUT152738.1	NONMMUG095800.1	320	NM_023312	Ndufa13	1268	-37.13	-0.1186	1	320	800	1119
NONMMUT011351.2	NONMMUG007169.2	214	NM_177167	Ppm1e	6315	-32.11	-0.1622	1	214	5783	5996
NONMMUT021419.2	NONMMUG013297.2	215	NM_001359159	Entpd4b	6064	-28.19	-0.1342	1	215	5831	6045
NONMMUT028120.2	NONMMUG017416.2	479	NM_201230	Fgfr1op	3094	-47.31	-0.2414	1	207	2888	3094
NONMMUT046955.2	NONMMUG029023.2	593	NM_001310758	Unc13b	6372	-48.98	-0.2075	1	289	6084	6372
NONMMUT050859.2	NONMMUG031526.2	335	NM_001163722	Smim1	3368	-39.53	-0.1216	1	335	505	839
NONMMUT056817.2	NONMMUG035263.2	299	NM_001347153	Krba1	7002	-41.91	-0.1426	1	299	993	1291
NONMMUT065528.2	NONMMUG040528.2	249	NM_177240	Trappc11	4322	-27.85	-0.1151	1	249	2266	2514
NONMMUT077842.1	NONMMUG000674.2	220	NM_001081181	Maip1	3601	-26.41	-0.1240	1	220	3181	3400
NONMMUT078858.1	NONMMUG049065.1	255	NM_178260	Kiss1	496	-26.79	-0.1085	1	255	152	406
NONMMUT081245.1	NONMMUG050507.1	544	NM_001347171	Mbd6	4287	-48.26	-0.1036	1	544	570	1113
NONMMUT096052.1	NONMMUG014791.2	2278	NM_001271416	Ly6a	1002	-159.21	-0.1615	514	1515	1	1002
NONMMUT096525.1	NONMMUG060329.1	1415	NM_001355497	Tfcp2	3323	-62.97	-0.2217	1	301	3023	3323
NONMMUT105807.1	NONMMUG066133.2	239	NM_172835	Peli3	1937	-28.31	-0.1205	1	239	989	1227
NONMMUT113599.1	NONMMUG071204.1	226	NM_001037722	Adam15	3007	-22.17	-0.1192	1	226	1592	1817
NONMMUT113648.1	NONMMUG027267.3	360	NM_018877	Setdb1	4622	-39.64	-0.1190	1	360	1414	1773
NONMMUT127726.1	NONMMUG080175.1	675	NM_008855	Prkcb	8829	-73.01	-0.1088	1	675	7116	7790
NONMMUT127904.1	NONMMUG039615.2	345	NM_001162924	Pkp3	2908	-33.74	-0.1159	48	345	1	298
NONMMUT133957.1	NONMMUG084415.1	388	NM_001359227	Slc44a2	3629	-41.7	-0.1149	1	388	2096	2483
NONMMUT141011.1	NONMMUG088976.1	202	NM_001130170	Zfp207	2314	-23.32	-0.1234	1	202	749	950
NONMMUT144541.1	NONMMUG091045.1	1996	NM_011672	Ufd1	1996	-111.69	-0.1074	953	1996	1	1044
NONMMUT148915.1	NONMMUG093642.1	760	NM_021290	Ucn	644	-58.22	-0.1055	149	760	1	612
NONMMUT149202.1	NONMMUG074954.2	423	NM_001081468	Gtf2ird1	3306	-49.99	-0.1501	65	423	1	359
NONMMUT151956.1	NONMMUG095418.1	254	NM_021482	Syngr4	964	-27.85	-0.1123	1	254	418	671
NONMMUT011353.2	NONMMUG007170.2	214	NM_031386	Tex14	4763	-18.51	-0.1076	1	214	941	1154
NONMMUT012003.2	NONMMUG007584.2	400	NM_176830	P3h4	1867	-39.39	-0.1002	1	400	1235	1634
NONMMUT013224.2	NONMMUG008390.3	301	NM_008445	Kif3c	6849	-28.46	-0.1134	1	301	5647	5947
NONMMUT021419.2	NONMMUG013297.2	215	NM_026174	Entpd4	6168	-28.19	-0.1342	1	215	5935	6149
NONMMUT023387.2	NONMMUG014468.2	580	NM_001285840	Sybu	3029	-61.35	-0.1158	1	580	42	621
NONMMUT043950.2	NONMMUG027118.2	227	NM_013631	Pklr	2787	-20.3	-0.1277	1	227	2011	2237
NONMMUT046950.2	NONMMUG029023.2	487	NM_001355440	Dnajb5	3302	-38.58	-0.1069	1	395	2908	3302
NONMMUT050192.2	NONMMUG031077.2	333	NM_001369179	Ece1	4686	-30.18	-0.1023	1	333	4339	4671
NONMMUT050859.2	NONMMUG031526.2	335	NM_011642	Trp73	4710	-39.66	-0.1255	1	335	1025	1359
NONMMUT053224.2	NONMMUG033062.2	684	NM_001277268	Fgf5	2400	-81.02	-0.1218	1	684	1716	2399
NONMMUT056817.2	NONMMUG035263.2	299	NM_001347168	Rarres2	696	-28.15	-0.1039	1	299	293	591
NONMMUT063001.2	NONMMUG038883.3	613	NM_001122739	Inppl1	4758	-61	-0.1093	1	613	3416	4028
NONMMUT070902.2	NONMMUG043911.2	230	NM_008317	Hyal1	2995	-28.18	-0.1264	1	230	1605	1834
NONMMUT077842.1	NONMMUG000674.2	220	NM_001302964	Tyw5	1394	-24.31	-0.1152	1	220	60	279
NONMMUT096052.1	NONMMUG014791.2	2278	NM_001271419	Ly6a	956	-164.93	-0.1742	560	1515	1	956
NONMMUT099176.1	NONMMUG062052.1	241	NM_001145887	Tiam1	4188	-22.87	-0.1059	1	241	2029	2269
NONMMUT106295.1	NONMMUG066424.1	653	NM_001177813	Wbp1l	3869	-70.17	-0.1102	1	653	913	1565
NONMMUT113648.1	NONMMUG027267.3	360	NM_029789	Cers2	2110	-35.88	-0.1154	1	324	1787	2110
NONMMUT127726.1	NONMMUG080175.1	675	NM_027363	Chp2	1171	-80.12	-0.1223	1	675	431	1105
NONMMUT127904.1	NONMMUG039615.2	345	NM_001355055	Sigirr	1618	-32.31	-0.1003	1	345	576	920
NONMMUT133957.1	NONMMUG084415.1	388	NM_010744	Tmed1	1535	-40.84	-0.1069	1	388	635	1022
NONMMUT141011.1	NONMMUG088976.1	202	NM_009871	Cdk5r1	4162	-28.99	-0.1534	1	202	61	262
NONMMUT149202.1	NONMMUG074954.2	423	NM_001244936	Gtf2ird1	4301	-49.99	-0.1501	65	423	1	359
NONMMUT151956.1	NONMMUG095418.1	254	NM_145963	Kcnj14	2639	-27.36	-0.1174	1	254	1506	1759
NONMMUT027049.2	NONMMUG016772.2	216	NM_001252450	Cldnd1	2187	-20.05	-0.1013	1	216	1319	1534
NONMMUT028120.2	NONMMUG017416.2	479	NM_001197046	Fgfr1op	3154	-47.31	-0.2414	1	207	2948	3154
NONMMUT039312.2	NONMMUG024291.2	221	NM_028117	Chst14	2087	-20.81	-0.1107	1	221	448	668
NONMMUT043950.2	NONMMUG027118.2	227	NM_007712	Clk2	2320	-25.62	-0.1154	1	227	1995	2221
NONMMUT046952.2	NONMMUG029023.2	413	NM_001374167	Dnajb5	3334	-38.61	-0.1199	64	413	1	350
NONMMUT046955.2	NONMMUG029023.2	593	NM_001081413	Unc13b	6405	-48.98	-0.2075	1	289	6117	6405
NONMMUT050858.2	NONMMUG031526.2	578	NM_201226	Lrrc47	3395	-68.7	-0.1242	1	556	2840	3395
NONMMUT056817.2	NONMMUG035263.2	299	NM_001079905	Repin1	2957	-34.7	-0.1621	46	299	1	254
NONMMUT057351.2	NONMMUG035606.2	405	NM_009075	Rpia	1772	-30.06	-0.1093	82	405	1	324
NONMMUT063765.2	NONMMUG039382.2	281	NM_146259	Zfp668	7798	-87.24	-0.3196	1	281	4849	5129
NONMMUT068287.2	NONMMUG042239.2	290	NM_183408	Pde4a	4653	-25.94	-0.1029	1	290	298	587
NONMMUT070902.2	NONMMUG043911.2	230	NM_001291538	Sema3b	4004	-24.5	-0.1150	1	230	2526	2755
NONMMUT078858.1	NONMMUG049065.1	255	NM_001160268	Plekha6	7085	-26.57	-0.1071	1	255	5062	5316
NONMMUT085736.1	NONMMUG053379.1	236	NM_008379	Kpnb1	5909	-23.35	-0.1179	1	236	186	421
NONMMUT088703.1	NONMMUG009442.2	417	NM_001033149	Ttc9	4778	-28.67	-0.1050	1	306	4473	4778
NONMMUT105807.1	NONMMUG066133.2	239	NM_029576	Rab1b	1835	-26.4	-0.1148	1	239	707	945
NONMMUT113648.1	NONMMUG027267.3	360	NM_001038708	Cdc42se1	2758	-40.58	-0.1226	1	360	1594	1953
NONMMUT121351.1	NONMMUG076104.1	231	NM_026603	Denr	2236	-20.11	-0.1053	1	231	1453	1683
NONMMUT121645.1	NONMMUG034325.3	324	NM_001359055	Gpr12	2481	-36.35	-0.1143	1	324	212	535
NONMMUT124895.1	NONMMUG078289.2	689	NM_178252	Arhgap33	4447	-68.12	-0.1027	20	689	1	670
NONMMUT124904.1	NONMMUG037680.2	529	NM_001364010	Krtdap	409	-22.03	-0.2225	1	123	287	409
NONMMUT133957.1	NONMMUG084415.1	388	NM_001277321	Ilf3	3582	-40.85	-0.1285	1	333	3250	3582
NONMMUT141975.1	NONMMUG089467.1	591	NM_134247	Acot4	2325	-59.13	-0.1133	1	591	1725	2315
NONMMUT149202.1	NONMMUG074954.2	423	NM_001081462	Gtf2ird1	4691	-49.99	-0.1501	65	423	1	359
NONMMUT149803.1	NONMMUG034325.3	396	NM_001359058	Gpr12	2067	-37.35	-0.1279	1	396	1560	1955
NONMMUT151162.1	NONMMUG094971.1	604	NM_001368878	Sytl2	8033	-55.41	-0.2368	1	281	7753	8033
NONMMUT151929.1	NONMMUG095401.1	300	NM_025886	Rassf7	1525	-30.48	-0.1112	1	300	1127	1426
NONMMUT151956.1	NONMMUG095418.1	254	NM_001291064	Syngr4	824	-24.75	-0.1023	1	254	570	823
NONMMUT024064.2	NONMMUG014868.2	260	NM_012053	Rpl8	862	-23.29	-0.1040	1	260	240	499
NONMMUT036901.2	NONMMUG022712.2	309	NM_001083127	Lhx6	3188	-35.52	-0.1204	1	309	94	402
NONMMUT043950.2	NONMMUG027118.2	227	NM_001357367	Mtx1	1208	-22.93	-0.1152	1	227	632	858
NONMMUT046952.2	NONMMUG029023.2	413	NM_001355440	Dnajb5	3302	-38.58	-0.1069	1	388	2915	3302
NONMMUT046954.2	NONMMUG029023.2	551	NM_172691	Fam214b	3074	-54.22	-0.1063	1	551	226	776
NONMMUT056817.2	NONMMUG035263.2	299	NM_001079904	Repin1	3072	-35.47	-0.1730	46	299	1	254
NONMMUT057351.2	NONMMUG035606.2	405	NM_001313918	Eif2ak3	965	-34.76	-0.1010	1	405	462	866
NONMMUT063765.2	NONMMUG039382.2	281	NM_133943	Hsd3b7	1823	-29.71	-0.1315	1	249	1575	1823
NONMMUT068287.2	NONMMUG042239.2	290	NM_153583	Atg4d	3024	-31.97	-0.1126	1	290	94	383
NONMMUT070902.2	NONMMUG043911.2	230	NM_001291537	Sema3b	4010	-24.5	-0.1150	1	230	2532	2761
NONMMUT085736.1	NONMMUG053379.1	236	NM_001372531	Tbkbp1	3324	-28.26	-0.1372	1	236	1290	1525
NONMMUT105807.1	NONMMUG066133.2	239	NM_026553	Yif1a	1493	-23.73	-0.1055	1	239	146	384
NONMMUT106809.1	NONMMUG022514.2	556	NM_175392	Miga2	3547	-54.46	-0.1028	1	556	923	1478
NONMMUT113648.1	NONMMUG027267.3	360	NM_001024841	Gm128	1470	-43.45	-0.1493	1	360	1025	1384
NONMMUT121645.1	NONMMUG034325.3	324	NM_001243114	Gm3415	2354	-31.48	-0.1022	1	324	1474	1797
NONMMUT124904.1	NONMMUG037680.2	529	NM_001364009	Krtdap	367	-22.03	-0.2225	1	123	245	367
NONMMUT132621.1	NONMMUG083496.2	395	NM_010729	Loxl1	3338	-51.5	-0.1327	1	395	1101	1495
NONMMUT133957.1	NONMMUG084415.1	388	NM_001253894	Dnm2	3068	-50.56	-0.1474	19	388	1	370
NONMMUT141975.1	NONMMUG089467.1	591	NM_134188	Acot2	2198	-67.06	-0.1144	1	591	1471	2061
NONMMUT146009.1	NONMMUG091912.1	258	NM_207268	Ccdc87	3163	-21.06	-0.1027	1	258	1350	1607
NONMMUT149202.1	NONMMUG074954.2	423	NM_001039162	Clip2	4893	-63.84	-0.1740	1	423	190	612
NONMMUT149222.1	NONMMUG034039.3	767	NM_001302938	Sh2b2	2881	-80.34	-0.1084	1	767	173	939
NONMMUT149803.1	NONMMUG034325.3	396	NM_001359057	Gpr12	2464	-37.35	-0.1279	1	396	1957	2352
NONMMUT150866.1	NONMMUG037574.3	471	NM_001290542	Plekhg2	5272	-48.71	-0.1154	1	471	53	523
NONMMUT151162.1	NONMMUG094971.1	604	NM_001360867	Picalm	4154	-60.16	-0.1361	1	489	3666	4154
NONMMUT151929.1	NONMMUG095401.1	300	NM_016874	Deaf1	2192	-36.27	-0.1468	1	300	44	343
NONMMUT151956.1	NONMMUG095418.1	254	NM_001290990	Lmtk3	4995	-31.95	-0.1309	1	254	2231	2484
NONMMUT005037.2	NONMMUG003231.2	468	NM_001308329	Enpp1	6752	-32.23	-0.1064	135	468	1	334
NONMMUT010862.2	NONMMUG006854.2	282	NM_001362625	Flot2	2621	-24.84	-0.1150	1	255	2367	2621
NONMMUT024064.2	NONMMUG014868.2	260	NM_001168276	Zfp647	2298	-25.97	-0.1087	1	260	514	773
NONMMUT025303.2	NONMMUG015661.2	1074	NM_001253797	Smim22	434	-39.73	-0.1129	693	1074	1	382
NONMMUT036900.2	NONMMUG022712.2	227	NM_008969	Ptgs1	2866	-21.97	-0.1132	1	227	1607	1833
NONMMUT041142.2	NONMMUG025497.2	300	NM_001363019	Zmynd8	5713	-31.88	-0.1081	1	300	2917	3216
NONMMUT043950.2	NONMMUG027118.2	227	NM_001310016	Gm45927	2938	-25.62	-0.1154	1	227	2613	2839
NONMMUT046952.2	NONMMUG029023.2	413	NM_001305386	Pigo	3601	-42.57	-0.1263	1	413	3021	3433
NONMMUT050810.2	NONMMUG031505.2	318	NM_001355739	Nphp4	4912	-29.39	-0.1057	1	290	4623	4912
NONMMUT050858.2	NONMMUG031526.2	578	NM_001163722	Smim1	3368	-61.74	-0.1211	1	578	406	983
NONMMUT053799.2	NONMMUG033378.2	347	NM_019640	Pitpnb	2827	-33.94	-0.1025	1	347	95	441
NONMMUT053870.2	NONMMUG033405.2	374	NM_019982	Sez6l	6077	-34.58	-0.1017	1	374	1341	1714
NONMMUT061197.2	NONMMUG038000.3	374	NM_018876	Fut2	2955	-34.61	-0.1018	1	374	725	1098
NONMMUT063765.2	NONMMUG039382.2	281	NM_009294	Stx4a	1358	-27.94	-0.1023	1	281	64	344
NONMMUT064983.2	NONMMUG040136.2	252	NM_001364069	Letm2	1954	-22.22	-0.1134	24	252	1	229
NONMMUT070902.2	NONMMUG043911.2	230	NM_001174049	Cacna2d2	5512	-26.49	-0.1193	1	230	4222	4451
NONMMUT085172.1	NONMMUG053054.2	207	NM_146470	Olfr1392	1026	-18.83	-0.1170	1	207	271	477
NONMMUT089340.1	NONMMUG055653.1	255	NM_027118	Cdk13	6901	-22.64	-0.1011	1	255	1790	2044
NONMMUT133957.1	NONMMUG084415.1	388	NM_001042707	Ilf3	3552	-39.62	-0.1230	1	333	3220	3552
NONMMUT141974.1	NONMMUG089467.1	517	NM_134188	Acot2	2198	-54.62	-0.1106	1	517	1401	1917
NONMMUT149149.1	NONMMUG093797.1	795	NM_001359153	Atxn2	5886	-110.82	-0.1548	1	733	5154	5886
NONMMUT151162.1	NONMMUG094971.1	604	NM_001252524	Picalm	4004	-60.16	-0.1361	1	489	3516	4004
NONMMUT151929.1	NONMMUG095401.1	300	NM_007878	Drd4	2787	-33.53	-0.1295	1	300	2442	2741
NONMMUT152738.1	NONMMUG095800.1	320	NM_133224	Atp13a1	3914	-44.76	-0.1416	1	320	3554	3873
NONMMUT024164.2	NONMMUG014930.2	458	NM_145929	Gga1	3034	-38.94	-0.1004	50	458	1	409
NONMMUT028120.2	NONMMUG017416.2	479	NM_001033442	Gm1604b	1562	-43.41	-0.1017	43	479	1	437
NONMMUT031379.2	NONMMUG019271.2	254	NM_029277	Arhgap12	4957	-20.49	-0.1120	1	205	4753	4957
NONMMUT039913.2	NONMMUG024695.2	547	NM_009730	Atrn	8738	-47.63	-0.1267	148	547	1	400
NONMMUT041142.2	NONMMUG025497.2	300	NM_001291158	Zmynd8	7345	-31.88	-0.1081	1	300	4465	4764
NONMMUT049610.2	NONMMUG030721.2	412	NM_001285866	C77080	5049	-36.17	-0.1019	1	412	2208	2619
NONMMUT053799.2	NONMMUG033378.2	347	NM_001359216	Pitpnb	2650	-33.94	-0.1025	1	347	95	441
NONMMUT056816.2	NONMMUG035263.2	446	NM_173429	Zfp775	4083	-42.56	-0.1038	1	446	1473	1918
NONMMUT063765.2	NONMMUG039382.2	281	NM_001362191	Zfp668	7374	-87.24	-0.3196	1	281	4425	4705
NONMMUT066779.2	NONMMUG041330.2	294	NM_001033207	Nlrc5	6945	-29.26	-0.1023	1	294	1295	1588
NONMMUT068287.2	NONMMUG042239.2	290	NM_001310750	Pde4a	4585	-28.2	-0.1190	1	290	64	353
NONMMUT070902.2	NONMMUG043911.2	230	NM_001174047	Cacna2d2	5539	-26.49	-0.1193	1	230	4249	4478
NONMMUT085172.1	NONMMUG053054.2	207	NM_010794	Mgat1	3028	-24.37	-0.1256	1	207	1321	1527
NONMMUT089340.1	NONMMUG055653.1	255	NM_001081058	Cdk13	7081	-22.64	-0.1011	1	255	1790	2044
NONMMUT094646.1	NONMMUG059088.1	226	NM_026232	Slc25a30	1706	-26.23	-0.1237	1	226	676	901
NONMMUT105062.1	NONMMUG020600.2	427	NM_134148	Carns1	3968	-39.93	-0.1003	1	427	1271	1697
NONMMUT105807.1	NONMMUG066133.2	239	NM_001374048	Brms1	1281	-22.05	-0.1131	1	239	671	909
NONMMUT114919.1	NONMMUG029164.2	282	NM_198664	Tbc1d2	4305	-32.66	-0.1276	1	282	2304	2585
NONMMUT122172.1	NONMMUG035178.3	246	NM_013861	Tpk1	2671	-21.59	-0.2453	1	99	2573	2671
NONMMUT151162.1	NONMMUG094971.1	604	NM_001252522	Picalm	4043	-60.16	-0.1361	1	489	3555	4043
NONMMUT151929.1	NONMMUG095401.1	300	NM_001347565	Lmntd2	2077	-30.49	-0.1349	1	276	1802	2077
NONMMUT152738.1	NONMMUG095800.1	320	NM_026818	Cilp2	4022	-44.21	-0.1435	1	320	2517	2836
NONMMUT010862.2	NONMMUG006854.2	282	NM_008028	Flot2	2712	-24.84	-0.1150	1	255	2458	2712
NONMMUT024064.2	NONMMUG014868.2	260	NM_001358817	Zfp7	2774	-28.77	-0.1290	1	260	1923	2182
NONMMUT029235.2	NONMMUG018075.2	462	NM_019421	Cd320	2209	-32.69	-0.1721	249	462	1	214
NONMMUT036901.2	NONMMUG022712.2	309	NM_001083125	Lhx6	3378	-35.52	-0.1204	1	309	94	402
NONMMUT043950.2	NONMMUG027118.2	227	NM_001355760	Fam189b	3240	-25.71	-0.1213	1	227	2372	2598
NONMMUT046952.2	NONMMUG029023.2	413	NM_001355438	Dnajb5	3561	-42.64	-0.1609	129	413	1	285
NONMMUT050858.2	NONMMUG031526.2	578	NM_011642	Trp73	4710	-66.84	-0.1171	1	578	3969	4546
NONMMUT056817.2	NONMMUG035263.2	299	NM_001079902	Repin1	3143	-34.09	-0.1253	1	299	2553	2851
NONMMUT061197.2	NONMMUG038000.3	374	NM_028544	Rasip1	3152	-46.83	-0.1276	1	374	492	865
NONMMUT063765.2	NONMMUG039382.2	281	NM_026370	Kat8	1579	-28.62	-0.1072	1	281	883	1163
NONMMUT064983.2	NONMMUG040136.2	252	NM_010206	Fgfr1	5025	-26.56	-0.1116	1	252	4667	4918
NONMMUT068287.2	NONMMUG042239.2	290	NM_027911	Raver1	3453	-29.34	-0.1087	1	290	1380	1669
NONMMUT070902.2	NONMMUG043911.2	230	NM_001199218	Slc38a3	2462	-24.07	-0.1163	1	230	719	948
NONMMUT084932.1	NONMMUG052902.1	386	NM_139297	Ugp2	2847	-18.25	-0.1148	172	386	1	215
NONMMUT085172.1	NONMMUG053054.2	207	NM_172793	Btnl9	2463	-25.31	-0.1285	1	207	1066	1272
NONMMUT085736.1	NONMMUG053379.1	236	NM_001372529	Tbkbp1	3372	-28.26	-0.1372	1	236	1338	1573
NONMMUT088733.1	NONMMUG009478.2	239	NM_001310478	Rgs6	6037	-23.53	-0.1050	1	239	4072	4310
NONMMUT100957.1	NONMMUG018064.2	515	NM_001357162	Kank3	783	-34.63	-0.1246	1	336	448	783
NONMMUT105807.1	NONMMUG066133.2	239	NM_009920	Cnih2	1343	-30.03	-0.1329	1	239	1080	1318
NONMMUT106809.1	NONMMUG022514.2	556	NM_138748	Ptpa	2577	-53.14	-0.1005	1	556	1500	2055
NONMMUT121645.1	NONMMUG034325.3	324	NM_001010941	Gpr12	2469	-37.65	-0.1230	1	324	212	535
NONMMUT124895.1	NONMMUG078289.2	689	NM_133693	Rbm42	1701	-71.67	-0.1136	52	689	1	638
NONMMUT129339.1	NONMMUG081206.1	1049	NM_001164472	Nip7	2892	-104.76	-0.1035	1	1049	346	1394
NONMMUT133957.1	NONMMUG084415.1	388	NM_001199186	Slc44a2	3457	-41.7	-0.1149	1	388	1924	2311
NONMMUT148915.1	NONMMUG093642.1	760	NM_001346010	Ucn	639	-60.35	-0.1109	149	760	1	612
NONMMUT149803.1	NONMMUG034325.3	396	NM_001359055	Gpr12	2481	-37.35	-0.1279	1	396	1974	2369
NONMMUT150866.1	NONMMUG037574.3	471	NM_001141921	Lrfn1	2584	-45.22	-0.1079	20	471	1	452
NONMMUT151929.1	NONMMUG095401.1	300	NM_013782	Ptdss2	2172	-34.62	-0.1321	1	300	384	683
NONMMUT151956.1	NONMMUG095418.1	254	NM_001112701	Cyth2	2524	-28.27	-0.1173	1	254	2245	2498
NONMMUT024064.2	NONMMUG014868.2	260	NM_001358818	Zfp7	2827	-28.77	-0.1290	1	260	1923	2182
NONMMUT036901.2	NONMMUG022712.2	309	NM_001083126	Lhx6	3292	-35.52	-0.1204	1	309	94	402
NONMMUT041142.2	NONMMUG025497.2	300	NM_027230	Zmynd8	5423	-31.88	-0.1081	1	300	2543	2842
NONMMUT043950.2	NONMMUG027118.2	227	NM_001355765	Fam189b	3040	-25.71	-0.1213	1	227	2172	2398
NONMMUT046952.2	NONMMUG029023.2	413	NM_001355439	Dnajb5	3235	-38.89	-0.2542	1	165	3071	3235
NONMMUT049610.2	NONMMUG030721.2	412	NM_025970	Zbtb8os	3557	-100.11	-0.2554	1	412	1167	1578
NONMMUT056817.2	NONMMUG035263.2	299	NM_001079903	Repin1	3075	-35.47	-0.1730	46	299	1	254
NONMMUT061197.2	NONMMUG038000.3	374	NM_148927	Plekha4	2660	-38.14	-0.1149	1	374	1074	1447
NONMMUT063765.2	NONMMUG039382.2	281	NM_133351	Prss8	1860	-35.55	-0.1274	1	281	926	1206
NONMMUT066779.2	NONMMUG041330.2	294	NM_153507	Cpne2	2302	-33.87	-0.1193	1	294	589	882
NONMMUT070902.2	NONMMUG043911.2	230	NM_001243748	Rassf1	1787	-21.52	-0.1251	1	230	821	1050
NONMMUT085736.1	NONMMUG053379.1	236	NM_001372530	Tbkbp1	3400	-28.26	-0.1372	1	236	1366	1601
NONMMUT121351.1	NONMMUG076104.1	231	NM_001042421	Kntc1	6961	-22.03	-0.1102	1	231	2288	2518
NONMMUT121645.1	NONMMUG034325.3	324	NM_001243111	Gm3402	2308	-31.48	-0.1022	1	324	1451	1774
NONMMUT132621.1	NONMMUG083496.2	395	NM_008884	Pml	5239	-41.77	-0.1138	1	395	276	670
NONMMUT133957.1	NONMMUG084415.1	388	NM_001253893	Dnm2	3545	-50.56	-0.1474	19	388	1	370
NONMMUT141975.1	NONMMUG089467.1	591	NM_023633	Riox1	2346	-73.69	-0.1307	1	591	62	652
NONMMUT145115.1	NONMMUG091396.1	415	NM_030697	Kank3	2637	-36.69	-0.1048	1	415	1868	2282
NONMMUT146009.1	NONMMUG091912.1	258	NM_025717	Rbm4b	1830	-23.7	-0.1092	1	248	1583	1830
NONMMUT149202.1	NONMMUG074954.2	423	NM_001013751	Syna	2918	-45.12	-0.1077	1	423	448	870
NONMMUT149803.1	NONMMUG034325.3	396	NM_001359056	Gpr12	2471	-38.32	-0.1008	1	396	1964	2359
NONMMUT150866.1	NONMMUG037574.3	471	NM_001177427	Eid2b	2424	-42.78	-0.1049	1	471	1858	2328
NONMMUT151929.1	NONMMUG095401.1	300	NM_016850	Irf7	1859	-30.14	-0.1129	1	300	264	563
NONMMUT151956.1	NONMMUG095418.1	254	NM_001146346	Emp3	787	-25.95	-0.1434	71	254	1	184
NONMMUT005037.2	NONMMUG003231.2	468	NM_001308327	Enpp1	6781	-32.23	-0.1064	135	468	1	334
NONMMUT024621.2	NONMMUG015228.2	1125	NM_007692	Chkb	1753	-64.94	-0.1001	461	1125	1	665
NONMMUT025303.2	NONMMUG015661.2	1074	NM_001253796	Smim22	449	-40.13	-0.1053	678	1074	1	397
NONMMUT028120.2	NONMMUG017416.2	479	NM_001083938	Rnaset2a	979	-52.43	-0.1135	11	479	1	469
NONMMUT036900.2	NONMMUG022712.2	227	NM_008500	Lhx6	3482	-44.96	-0.2366	1	227	98	324
NONMMUT041142.2	NONMMUG025497.2	300	NM_001363018	Zmynd8	5789	-31.88	-0.1081	1	300	2909	3208
NONMMUT046954.2	NONMMUG029023.2	551	NM_009503	Vcp	3315	-40.24	-0.1223	1	334	2982	3315
NONMMUT049610.2	NONMMUG030721.2	412	NM_001285867	C77080	4938	-36.17	-0.1019	1	412	2097	2508
NONMMUT050858.2	NONMMUG031526.2	578	NM_001163721	Smim1	3442	-61.74	-0.1211	1	578	480	1057
NONMMUT053799.2	NONMMUG033378.2	347	NM_001359217	Pitpnb	2711	-33.94	-0.1025	1	347	95	441
NONMMUT054919.2	NONMMUG034075.2	1164	NM_027356	Ufsp1	996	-51.74	-0.1021	572	1164	1	593
NONMMUT063765.2	NONMMUG039382.2	281	NM_001362192	Zfp668	7345	-87.24	-0.3196	1	281	4396	4676
NONMMUT064983.2	NONMMUG040136.2	252	NM_001308482	Nsd3	3812	-26.61	-0.1113	1	252	166	417
NONMMUT068287.2	NONMMUG042239.2	290	NM_016679	Keap1	4470	-35.14	-0.1306	1	290	26	315
NONMMUT070902.2	NONMMUG043911.2	230	NM_001174048	Cacna2d2	5521	-26.49	-0.1193	1	230	4231	4460
NONMMUT085172.1	NONMMUG053054.2	207	NM_146468	Olfr1391	936	-16.47	-0.1010	1	207	264	470
NONMMUT105062.1	NONMMUG020600.2	427	NM_178650	Tbc1d10c	1759	-43.76	-0.1116	1	427	993	1419
NONMMUT126786.1	NONMMUG037974.2	1160	NM_008497	Lhb	509	-54.16	-0.1096	124	632	1	509
NONMMUT133957.1	NONMMUG084415.1	388	NM_001039520	Dnm2	3542	-50.56	-0.1474	19	388	1	370
NONMMUT141974.1	NONMMUG089467.1	517	NM_023633	Riox1	2346	-60.74	-0.1196	1	517	1632	2148
NONMMUT148913.1	NONMMUG093642.1	1707	NM_001346010	Ucn	639	-57.94	-0.1008	558	1196	1	639
NONMMUT151162.1	NONMMUG094971.1	604	NM_001252523	Picalm	4028	-60.16	-0.1361	1	489	3540	4028
NONMMUT151929.1	NONMMUG095401.1	300	NM_001357825	Lrrc56	2835	-31.18	-0.1061	1	300	1337	1636
NONMMUT152738.1	NONMMUG095800.1	320	NM_032004	Tssk6	1335	-37.98	-0.1342	1	320	635	954
NONMMUT011357.2	NONMMUG007173.2	214	NM_001199293	Tex14	4782	-18.51	-0.1076	1	214	960	1173
NONMMUT012873.2	NONMMUG008170.2	504	NM_178620	Mfsd11	3120	-45.08	-0.1015	1	504	956	1459
NONMMUT035245.2	NONMMUG021718.2	290	NM_001285457	Gfra1	4649	-29.22	-0.1141	1	290	866	1155
NONMMUT044248.2	NONMMUG027311.2	388	NM_153053	Sf3b4	1741	-42.88	-0.1178	1	388	455	842
NONMMUT054013.2	NONMMUG033487.2	639	NM_026263	4930519G04Rik	2041	-77.12	-0.5588	490	639	1	150
NONMMUT056816.2	NONMMUG035263.2	446	NM_001079903	Repin1	3075	-43.51	-0.1151	1	399	2677	3075
NONMMUT056817.2	NONMMUG035263.2	299	NM_177736	Lrrc61	2910	-35.84	-0.1207	1	299	2174	2472
NONMMUT060450.2	NONMMUG037574.3	234	NM_019458	Paf1	1953	-21.88	-0.1013	1	234	89	322
NONMMUT066776.2	NONMMUG041330.2	356	NM_001033207	Nlrc5	6945	-38.4	-0.1133	1	356	4843	5198
NONMMUT067593.2	NONMMUG041876.2	227	NM_001357301	Spata2l	2404	-26.37	-0.1167	1	227	2158	2384
NONMMUT085371.1	NONMMUG053167.1	531	NM_173754	Usp43	4462	-43.68	-0.1060	106	531	1	426
NONMMUT093446.1	NONMMUG013656.2	3208	NM_009769	Klf5	1725	-91.48	-0.1867	1	501	1225	1725
NONMMUT097441.1	NONMMUG060924.2	383	NM_017376	Tef	4244	-36.84	-0.1266	1	298	3947	4244
NONMMUT100797.1	NONMMUG017693.2	694	NM_001289482	Zscan10	2405	-114.96	-0.1678	1	694	1607	2300
NONMMUT113599.1	NONMMUG071204.1	226	NM_009614	Adam15	2860	-22.17	-0.1192	1	226	1592	1817
NONMMUT119392.1	NONMMUG074888.1	271	NM_001310723	Kmt5a	2770	-29.25	-0.1255	1	271	35	305
NONMMUT122332.1	NONMMUG076722.1	252	NM_001171007	Nod1	4071	-24.45	-0.1164	1	252	2651	2902
NONMMUT145813.1	NONMMUG020761.3	312	NM_008766	Slc22a6	4026	-29.22	-0.1036	1	312	2993	3304
NONMMUT146014.1	NONMMUG066133.2	630	NM_007854	Slc29a2	2473	-48.08	-0.1014	1	482	1992	2473
NONMMUT149203.1	NONMMUG074954.2	422	NM_001039162	Clip2	4893	-40.02	-0.1048	1	422	3476	3897
NONMMUT011357.2	NONMMUG007173.2	214	NM_001291440	Rad51c	4083	-17.98	-0.1064	1	214	1780	1993
NONMMUT012509.2	NONMMUG007938.3	378	NM_015732	Axin2	4258	-36.81	-0.1358	1	292	3967	4258
NONMMUT026438.2	NONMMUG016370.2	402	NM_001159421	Ccdc58	970	-31.94	-0.1058	1	402	33	434
NONMMUT029835.2	NONMMUG018436.2	1742	NM_025433	Rpl7l1	2606	-144.38	-0.1067	1	1362	1245	2606
NONMMUT035245.2	NONMMUG021718.2	290	NM_010279	Gfra1	4664	-29.22	-0.1141	1	290	881	1170
NONMMUT044248.2	NONMMUG027311.2	388	NM_175662	H2ac20	468	-339.79	-2.0719	100	388	1	289
NONMMUT046956.2	NONMMUG029023.2	362	NM_001253353	Fam214b	3293	-44.67	-0.1333	1	362	1277	1638
NONMMUT060450.2	NONMMUG037574.3	234	NM_022024	Gmfg	1006	-20.14	-0.1049	1	234	718	951
NONMMUT061010.2	NONMMUG037901.2	662	NM_001034115	Shank1	7596	-67.72	-0.1060	1	662	3275	3936
NONMMUT067593.2	NONMMUG041876.2	227	NM_001357302	Spata2l	2100	-25.54	-0.1443	1	227	745	971
NONMMUT070902.2	NONMMUG043911.2	230	NM_178020	Hyal3	1830	-21.08	-0.1109	1	230	824	1053
NONMMUT077602.1	NONMMUG000404.2	295	NM_001289765	Zap70	2290	-32.58	-0.1112	1	295	1360	1654
NONMMUT097441.1	NONMMUG060924.2	383	NM_020507	Tob2	3994	-39.47	-0.1109	1	383	2846	3228
NONMMUT119392.1	NONMMUG074888.1	271	NM_001310725	Kmt5a	2626	-23.9	-0.1008	1	271	811	1081
NONMMUT122332.1	NONMMUG076722.1	252	NM_001288618	Crhr2	2700	-25.63	-0.1114	1	252	210	461
NONMMUT145776.1	NONMMUG091783.1	361	NM_153129	Pacs1	4342	-58.96	-0.1765	1	361	3927	4287
NONMMUT146159.1	NONMMUG092007.1	318	NM_001008542	Mxi1	2639	-31.22	-0.1161	1	296	2344	2639
NONMMUT151161.1	NONMMUG094971.1	478	NM_001252520	Picalm	4178	-66.45	-0.1438	1	478	147	624
NONMMUT151932.1	NONMMUG095404.1	461	NM_029426	Brsk2	4046	-48.9	-0.1143	1	449	3598	4046
NONMMUT152853.1	NONMMUG095865.1	507	NM_001141924	Bean1	3174	-42.03	-0.1033	1	507	2616	3122
NONMMUT153194.1	NONMMUG042571.3	296	NM_023655	Trim29	2830	-27.51	-0.1062	1	296	2357	2652
NONMMUT010862.2	NONMMUG006854.2	282	NM_001362627	Flot2	2530	-24.84	-0.1150	1	255	2276	2530
NONMMUT024064.2	NONMMUG014868.2	260	NM_001358816	Zfp7	3021	-28.77	-0.1290	1	260	1923	2182
NONMMUT025303.2	NONMMUG015661.2	1074	NM_001253803	Smim22	369	-36.06	-0.1178	692	1060	1	369
NONMMUT025761.2	NONMMUG015953.2	586	NM_007744	Comt	2114	-30.72	-0.1661	1	265	1850	2114
NONMMUT033664.2	NONMMUG020692.2	453	NM_001110504	Capn1	3049	-43.5	-0.1107	1	453	2449	2901
NONMMUT039312.2	NONMMUG024291.2	221	NM_001045523	Bahd1	4428	-22.5	-0.1027	1	221	3115	3335
NONMMUT043950.2	NONMMUG027118.2	227	NM_001310625	Krtcap2	566	-22.84	-0.1088	1	227	287	513
NONMMUT046952.2	NONMMUG029023.2	413	NM_001310758	Unc13b	6372	-43.22	-0.1294	62	413	1	352
NONMMUT049610.2	NONMMUG030721.2	412	NM_009030	Rbbp4	4407	-54.7	-0.1633	1	359	4049	4407
NONMMUT050858.2	NONMMUG031526.2	578	NM_007859	Dffb	2048	-59.32	-0.1096	1	578	1300	1877
NONMMUT056817.2	NONMMUG035263.2	299	NM_001079901	Repin1	3146	-34.96	-0.1376	1	299	2553	2851
NONMMUT063765.2	NONMMUG039382.2	281	NM_024414	Stx1b	1574	-35.22	-0.1376	1	281	907	1187
NONMMUT066779.2	NONMMUG041330.2	294	NM_026274	Rspry1	3849	-26.99	-0.1030	23	294	1	272
NONMMUT068287.2	NONMMUG042239.2	290	NM_019798	Pde4a	4145	-28.73	-0.1064	1	290	3624	3913
NONMMUT070902.2	NONMMUG043911.2	230	NM_001199217	Slc38a3	2442	-24.07	-0.1163	1	230	699	928
NONMMUT085172.1	NONMMUG053054.2	207	NM_147065	Olfr1390	936	-14.63	-0.1152	1	207	89	295
NONMMUT085736.1	NONMMUG053379.1	236	NM_001372528	Tbkbp1	3397	-28.26	-0.1372	1	236	1363	1598
NONMMUT096052.1	NONMMUG014791.2	2278	NM_001099217	Ly6c2	823	-182.44	-0.2236	690	1512	1	823
NONMMUT105807.1	NONMMUG066133.2	239	NM_008451	Klc2	2907	-27.58	-0.1204	1	239	2596	2834
NONMMUT106809.1	NONMMUG022514.2	556	NM_030244	Ier5l	1559	-75.06	-0.1416	1	556	253	808
NONMMUT121644.1	NONMMUG034325.3	326	NM_011669	Usp12	4274	-31.15	-0.1031	1	326	3118	3443
NONMMUT132621.1	NONMMUG083496.2	395	NM_001311088	Pml	5372	-42.06	-0.1076	1	395	1901	2295
NONMMUT133957.1	NONMMUG084415.1	388	NM_001042709	Ilf3	3738	-39.62	-0.1230	1	333	3406	3738
NONMMUT142787.1	NONMMUG056995.2	1131	NM_029303	Pfn3	545	-60.61	-0.1179	591	1131	1	541
NONMMUT146009.1	NONMMUG091912.1	258	NM_019869	Rbm14	3168	-27.92	-0.1198	1	258	1685	1942
NONMMUT149803.1	NONMMUG034325.3	396	NM_001010941	Gpr12	2469	-37.35	-0.1279	1	396	1962	2357
NONMMUT150866.1	NONMMUG037574.3	471	NM_001083912	Plekhg2	5049	-48.71	-0.1154	1	471	53	523
NONMMUT151162.1	NONMMUG094971.1	604	NM_001289584	Sytl2	4698	-54.75	-0.1772	1	355	4344	4698
NONMMUT151956.1	NONMMUG095418.1	254	NM_001005511	Lmtk3	4840	-31.95	-0.1309	1	254	2076	2329
NONMMUT152738.1	NONMMUG095800.1	320	NM_198101	Gmip	3925	-36.46	-0.1223	1	320	2184	2503
NONMMUT154065.1	NONMMUG096395.1	626	NM_010017	Dag1	5591	-60.38	-0.1005	1	626	1461	2086
NONMMUT004501.2	NONMMUG002899.2	256	NM_001355060	Cr1l	1673	-27.03	-0.1112	1	256	244	499
NONMMUT025761.2	NONMMUG015953.2	586	NM_001111062	Comt	2171	-30.72	-0.1661	1	265	1907	2171
NONMMUT036899.2	NONMMUG022712.2	364	NM_008500	Lhx6	3482	-37.35	-0.1112	1	364	54	417
NONMMUT050857.2	NONMMUG031526.2	400	NM_001163721	Smim1	3442	-39.55	-0.1163	1	400	154	553
NONMMUT059457.2	NONMMUG036949.2	886	NM_133688	Etfrf1	1386	-23.63	-0.1350	1	216	1171	1386
NONMMUT061197.2	NONMMUG038000.3	374	NM_001271981	Fut1	2442	-38.15	-0.1060	1	374	1480	1853
NONMMUT063001.2	NONMMUG038883.3	613	NM_027532	Anapc15	885	-38.49	-0.1146	1	439	447	885
NONMMUT067593.2	NONMMUG041876.2	227	NM_194444	Cdk10	1611	-22.1	-0.1100	1	204	1408	1611
NONMMUT077602.1	NONMMUG000404.2	295	NM_201365	Fam178b	1664	-33.95	-0.1221	1	295	1223	1517
NONMMUT085172.1	NONMMUG053054.2	207	NM_001110148	Mgat1	3153	-24.37	-0.1256	1	207	1321	1527
NONMMUT094587.1	NONMMUG013356.2	257	NM_001302095	Gfra2	3088	-26.39	-0.1068	1	257	591	847
NONMMUT105062.1	NONMMUG020600.2	427	NM_001290818	Grk2	3379	-44.38	-0.1165	1	395	2985	3379
NONMMUT113599.1	NONMMUG071204.1	226	NM_177041	Flad1	2206	-20.75	-0.1064	1	226	1776	2001
NONMMUT115798.1	NONMMUG072602.1	615	NM_001369179	Ece1	4686	-102.55	-0.1678	1	615	197	811
NONMMUT126628.1	NONMMUG037749.2	707	NM_001024707	Lrp3	3994	-75.38	-0.1075	1	707	847	1553
NONMMUT129714.1	NONMMUG081497.1	440	NM_001357315	Taf5l	2962	-36.28	-0.1096	85	440	1	356
NONMMUT139417.1	NONMMUG088078.1	253	NM_001243074	Cep57l1	2233	-26.01	-0.1097	1	253	627	879
NONMMUT145115.1	NONMMUG091396.1	415	NM_001195298	Kifc1	2322	-38.47	-0.1063	1	415	1452	1866
NONMMUT151161.1	NONMMUG094971.1	478	NM_001360867	Picalm	4154	-66.45	-0.1438	1	478	147	624
NONMMUT151929.1	NONMMUG095401.1	300	NM_001172064	Lrrc56	2554	-31.18	-0.1061	1	300	1337	1636
NONMMUT154065.1	NONMMUG096395.1	626	NM_001276481	Dag1	5534	-60.38	-0.1005	1	626	1404	2029
